# Supplementary material
Source: ML conference proceedings conference paper supplement (https://openreview.net/forum?id=p5nSQMPUyo)
Supplement: supplementary_material [file attachment]

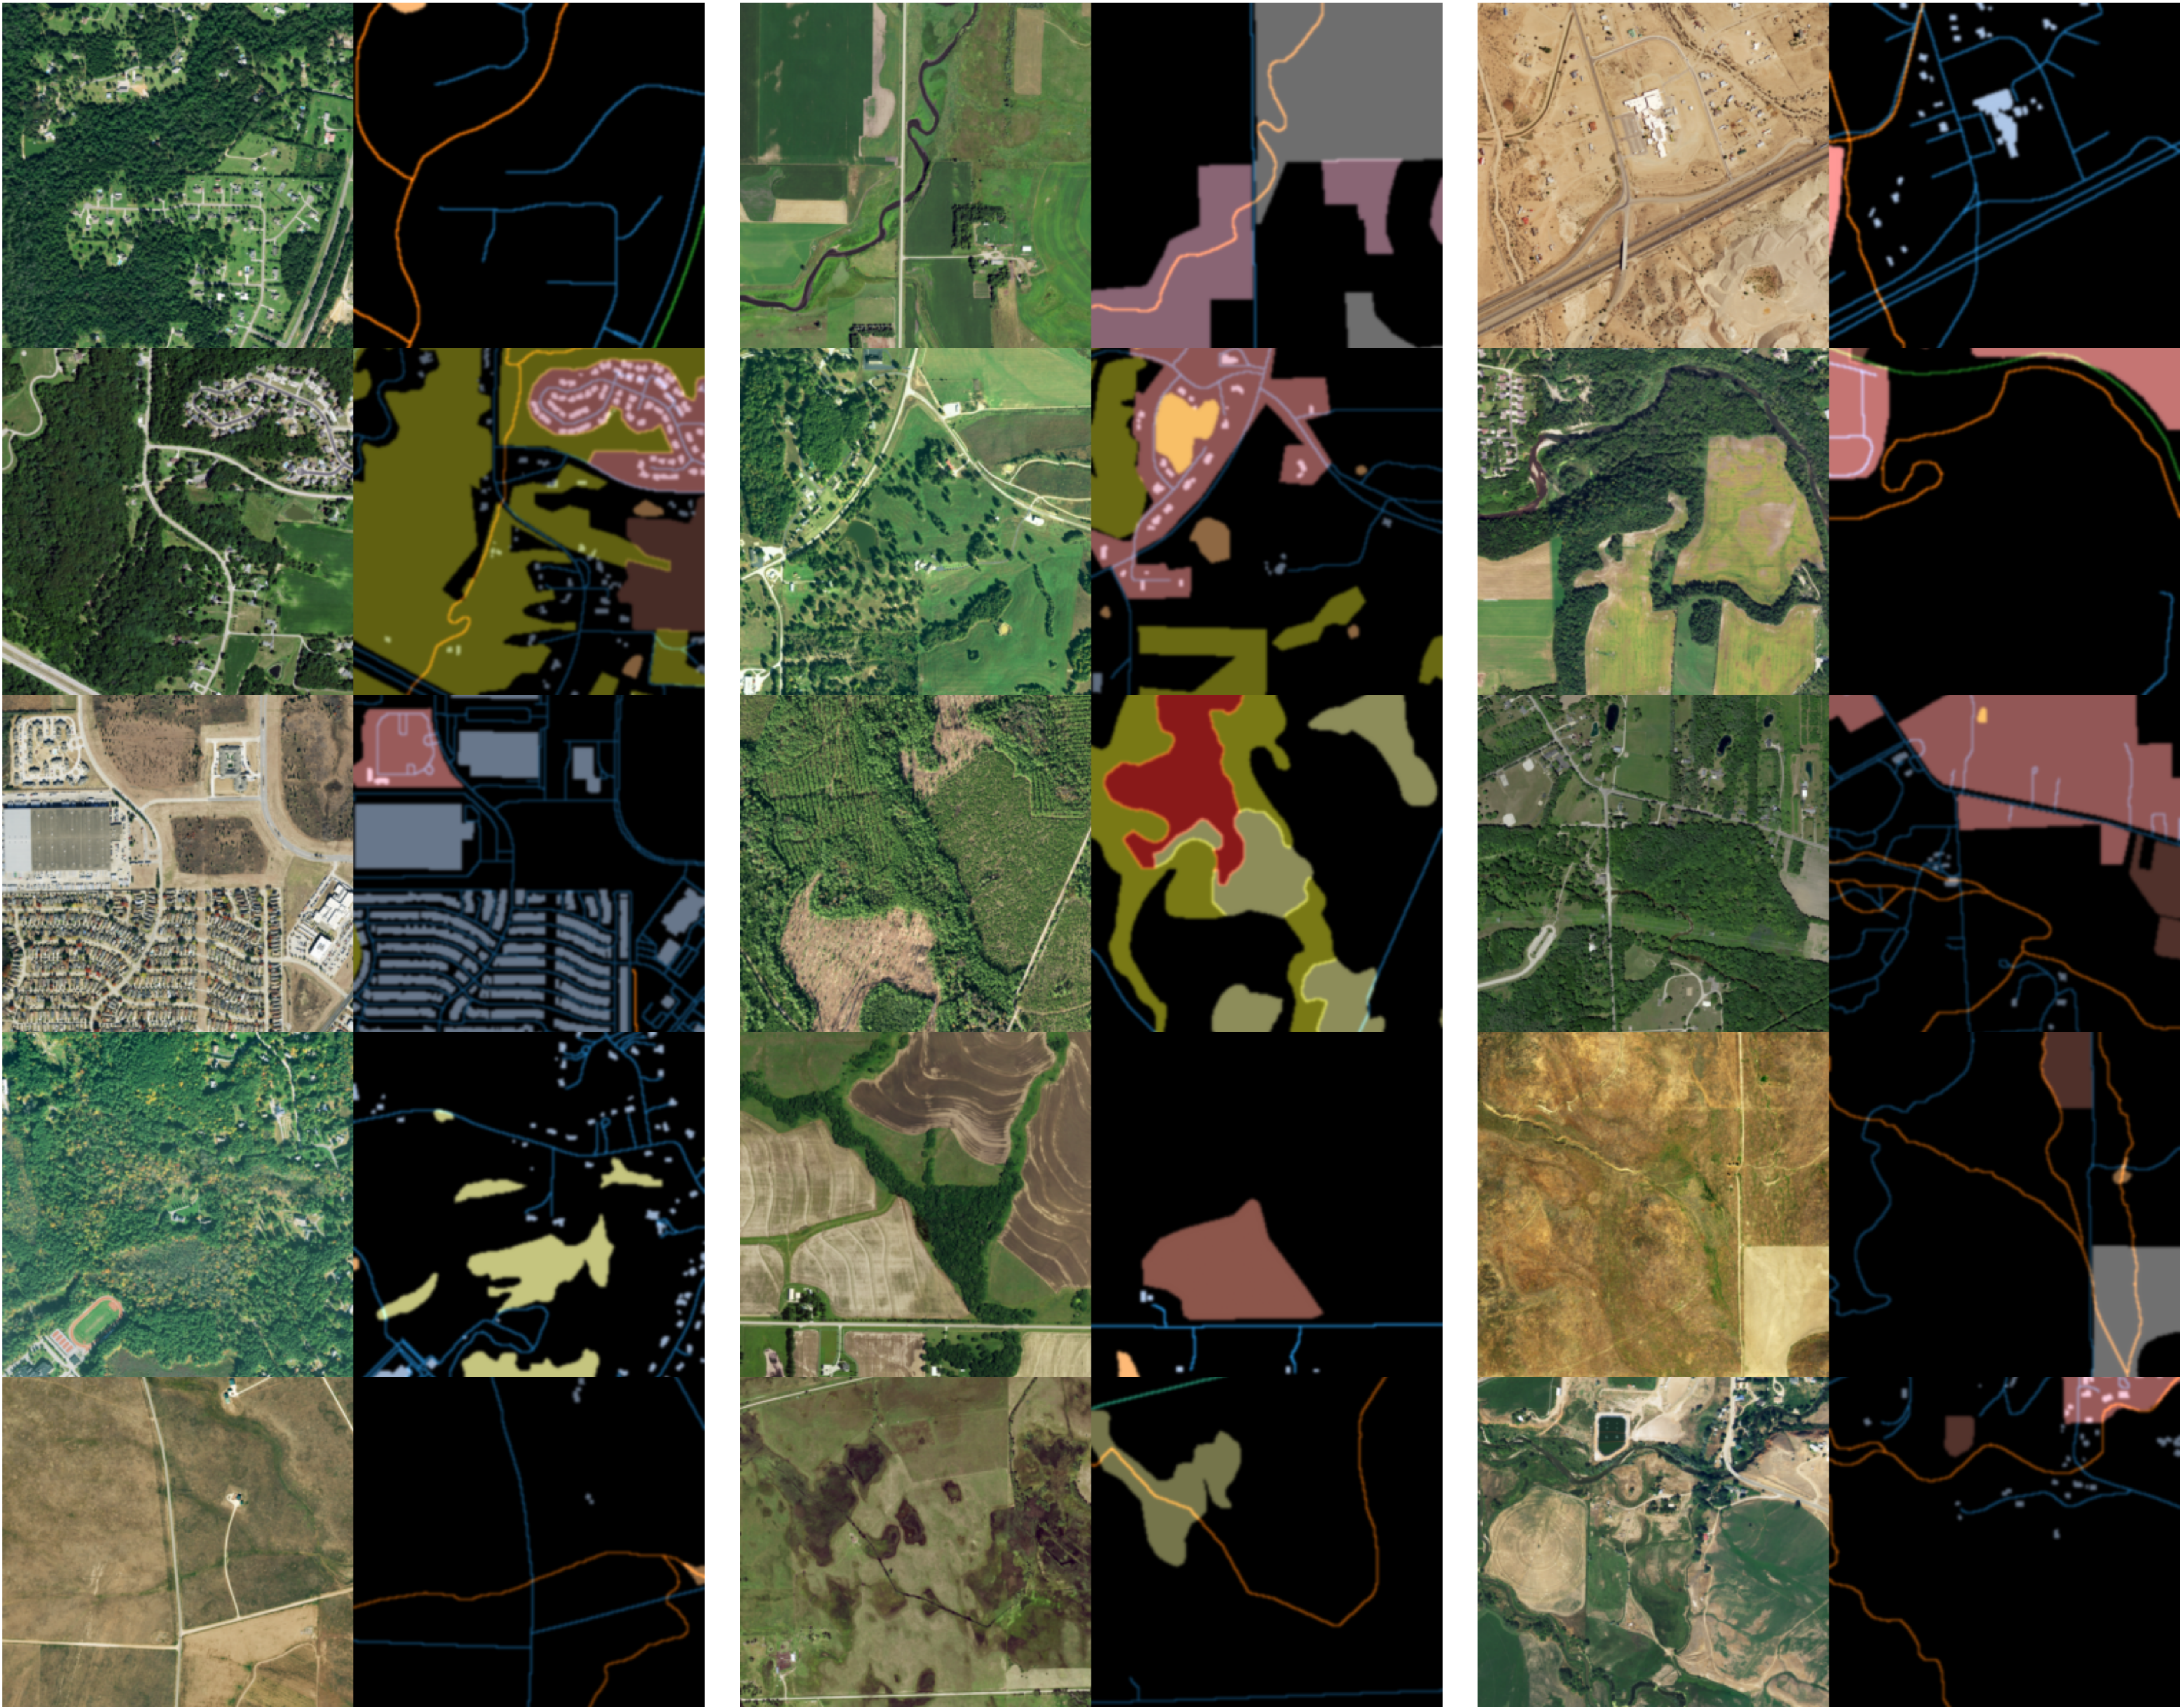

- |                                                                                                 |                                                                                                 |                                                                                                  |                                                                                                  |                                                                                               |
|-------------------------------------------------------------------------------------------------|-------------------------------------------------------------------------------------------------|--------------------------------------------------------------------------------------------------|--------------------------------------------------------------------------------------------------|-----------------------------------------------------------------------------------------------|
|  roads       |  railways    |  commercial |  vineyards  |  wood    |
|  buildings   |  parks       |  industrial |  grass      |  wetland |
|  waterways   |  forests     |  farmland   |  open_space |  gardens |
|  waterbodies |  residential |  orchards   |  grassland  |                                                                                               |
