# Supplementary material
Source: ML conference proceedings conference paper supplement (https://openreview.net/forum?id=p5nSQMPUyo)

# STACK

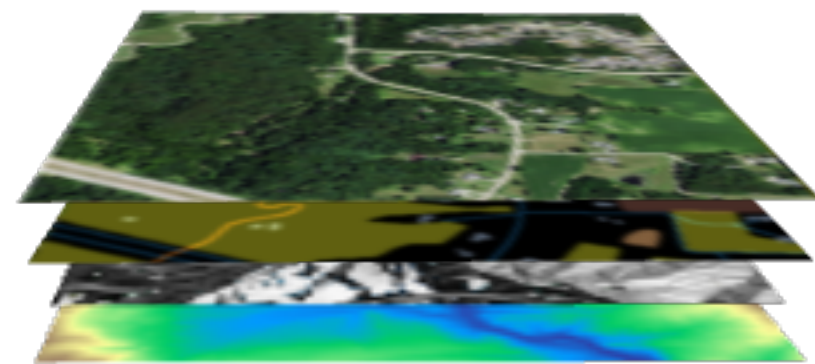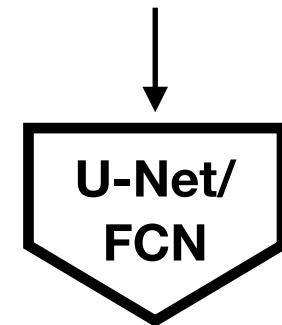

# PROC-STACK

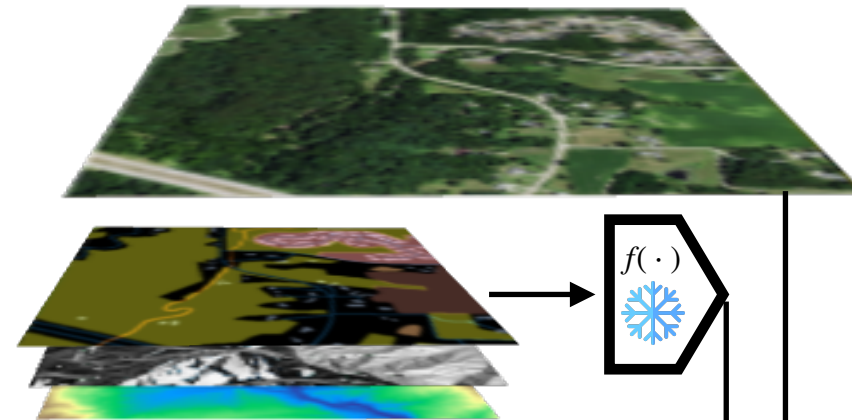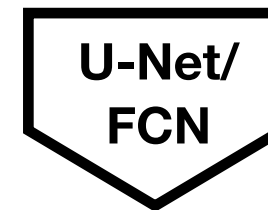

Legend

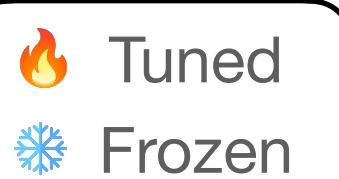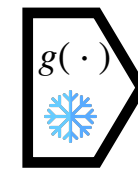

$(lat, lon)$

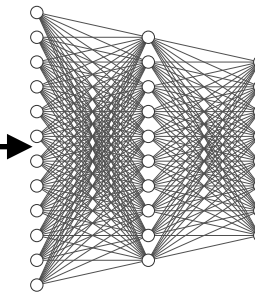

# TOKEN-FUSE

N+1

Auxiliary SatCLIP  
Token

ViT Encoder

0

1

2

3

.

.

.

N

Linear Projection of RGB Patches

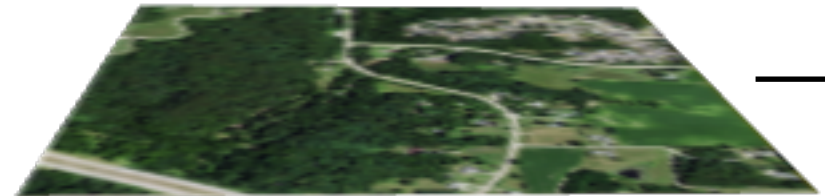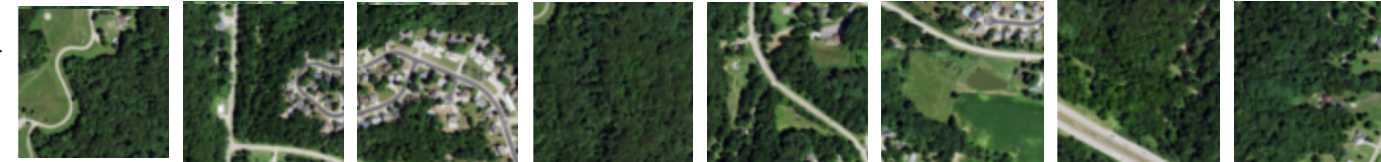

Supplement: supplementary_material [file attachment]
