# Supplementary material
Source: ML conference proceedings conference paper supplement (https://openreview.net/forum?id=p5nSQMPUyo)

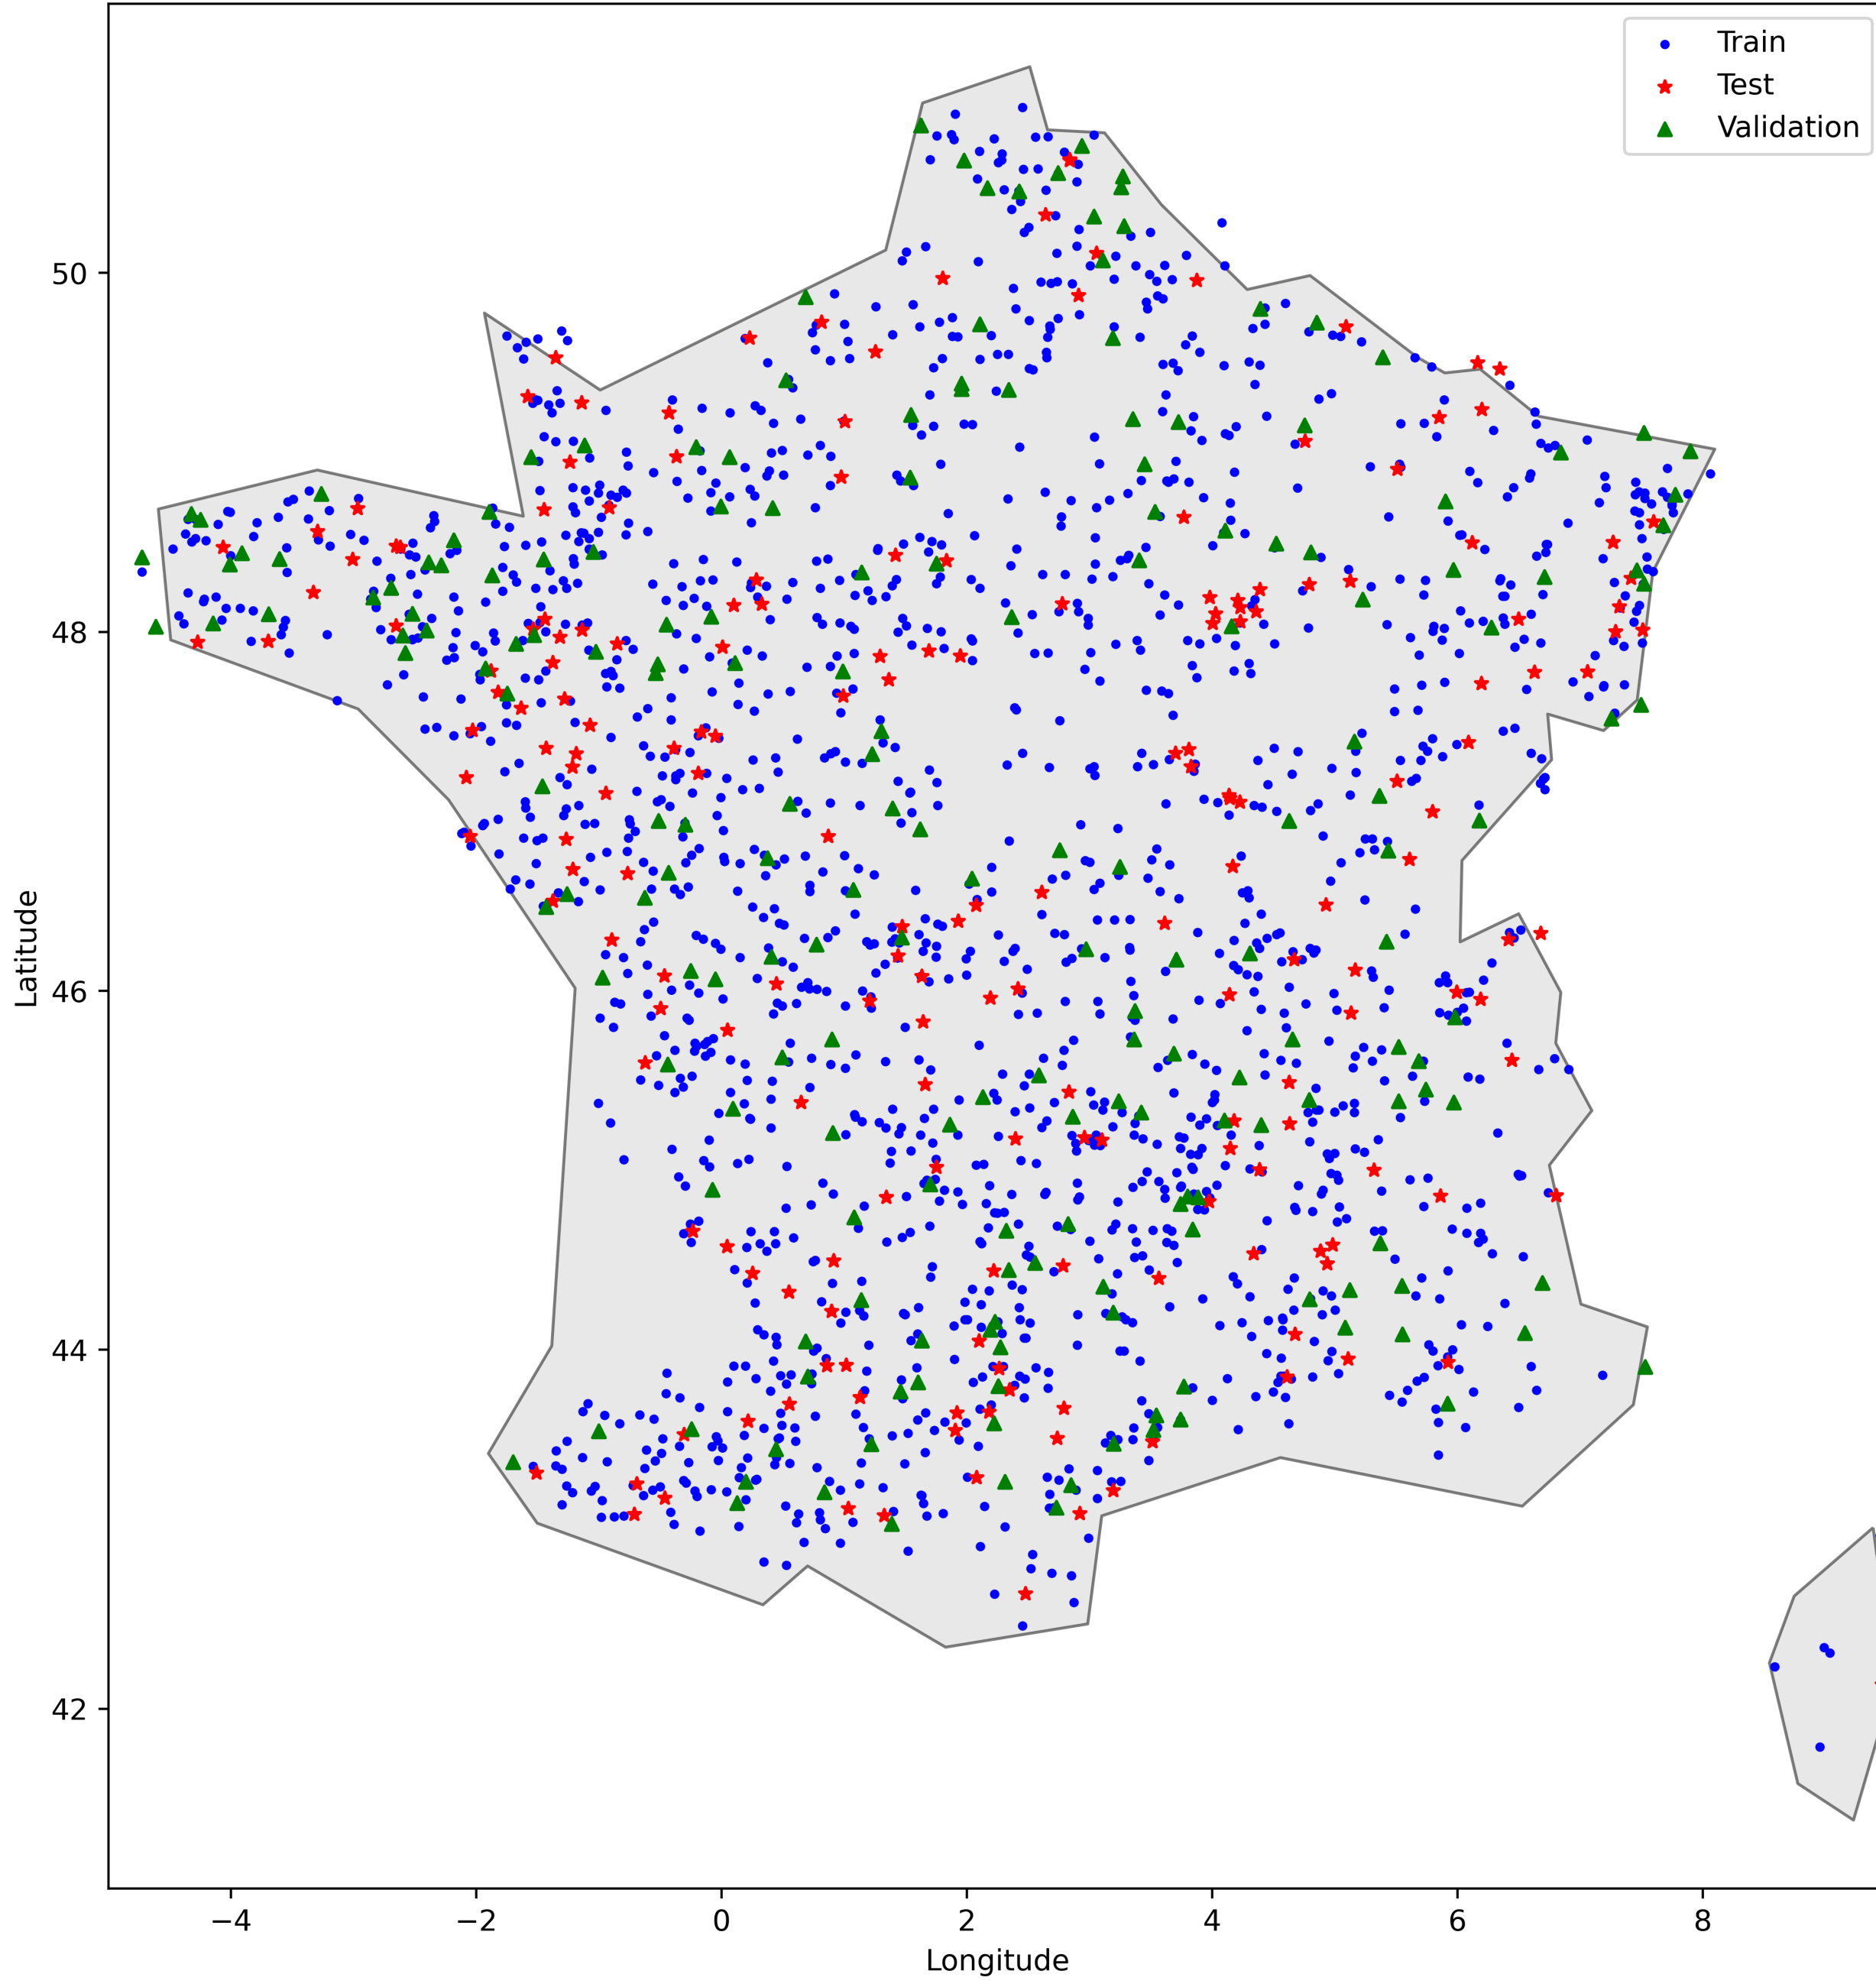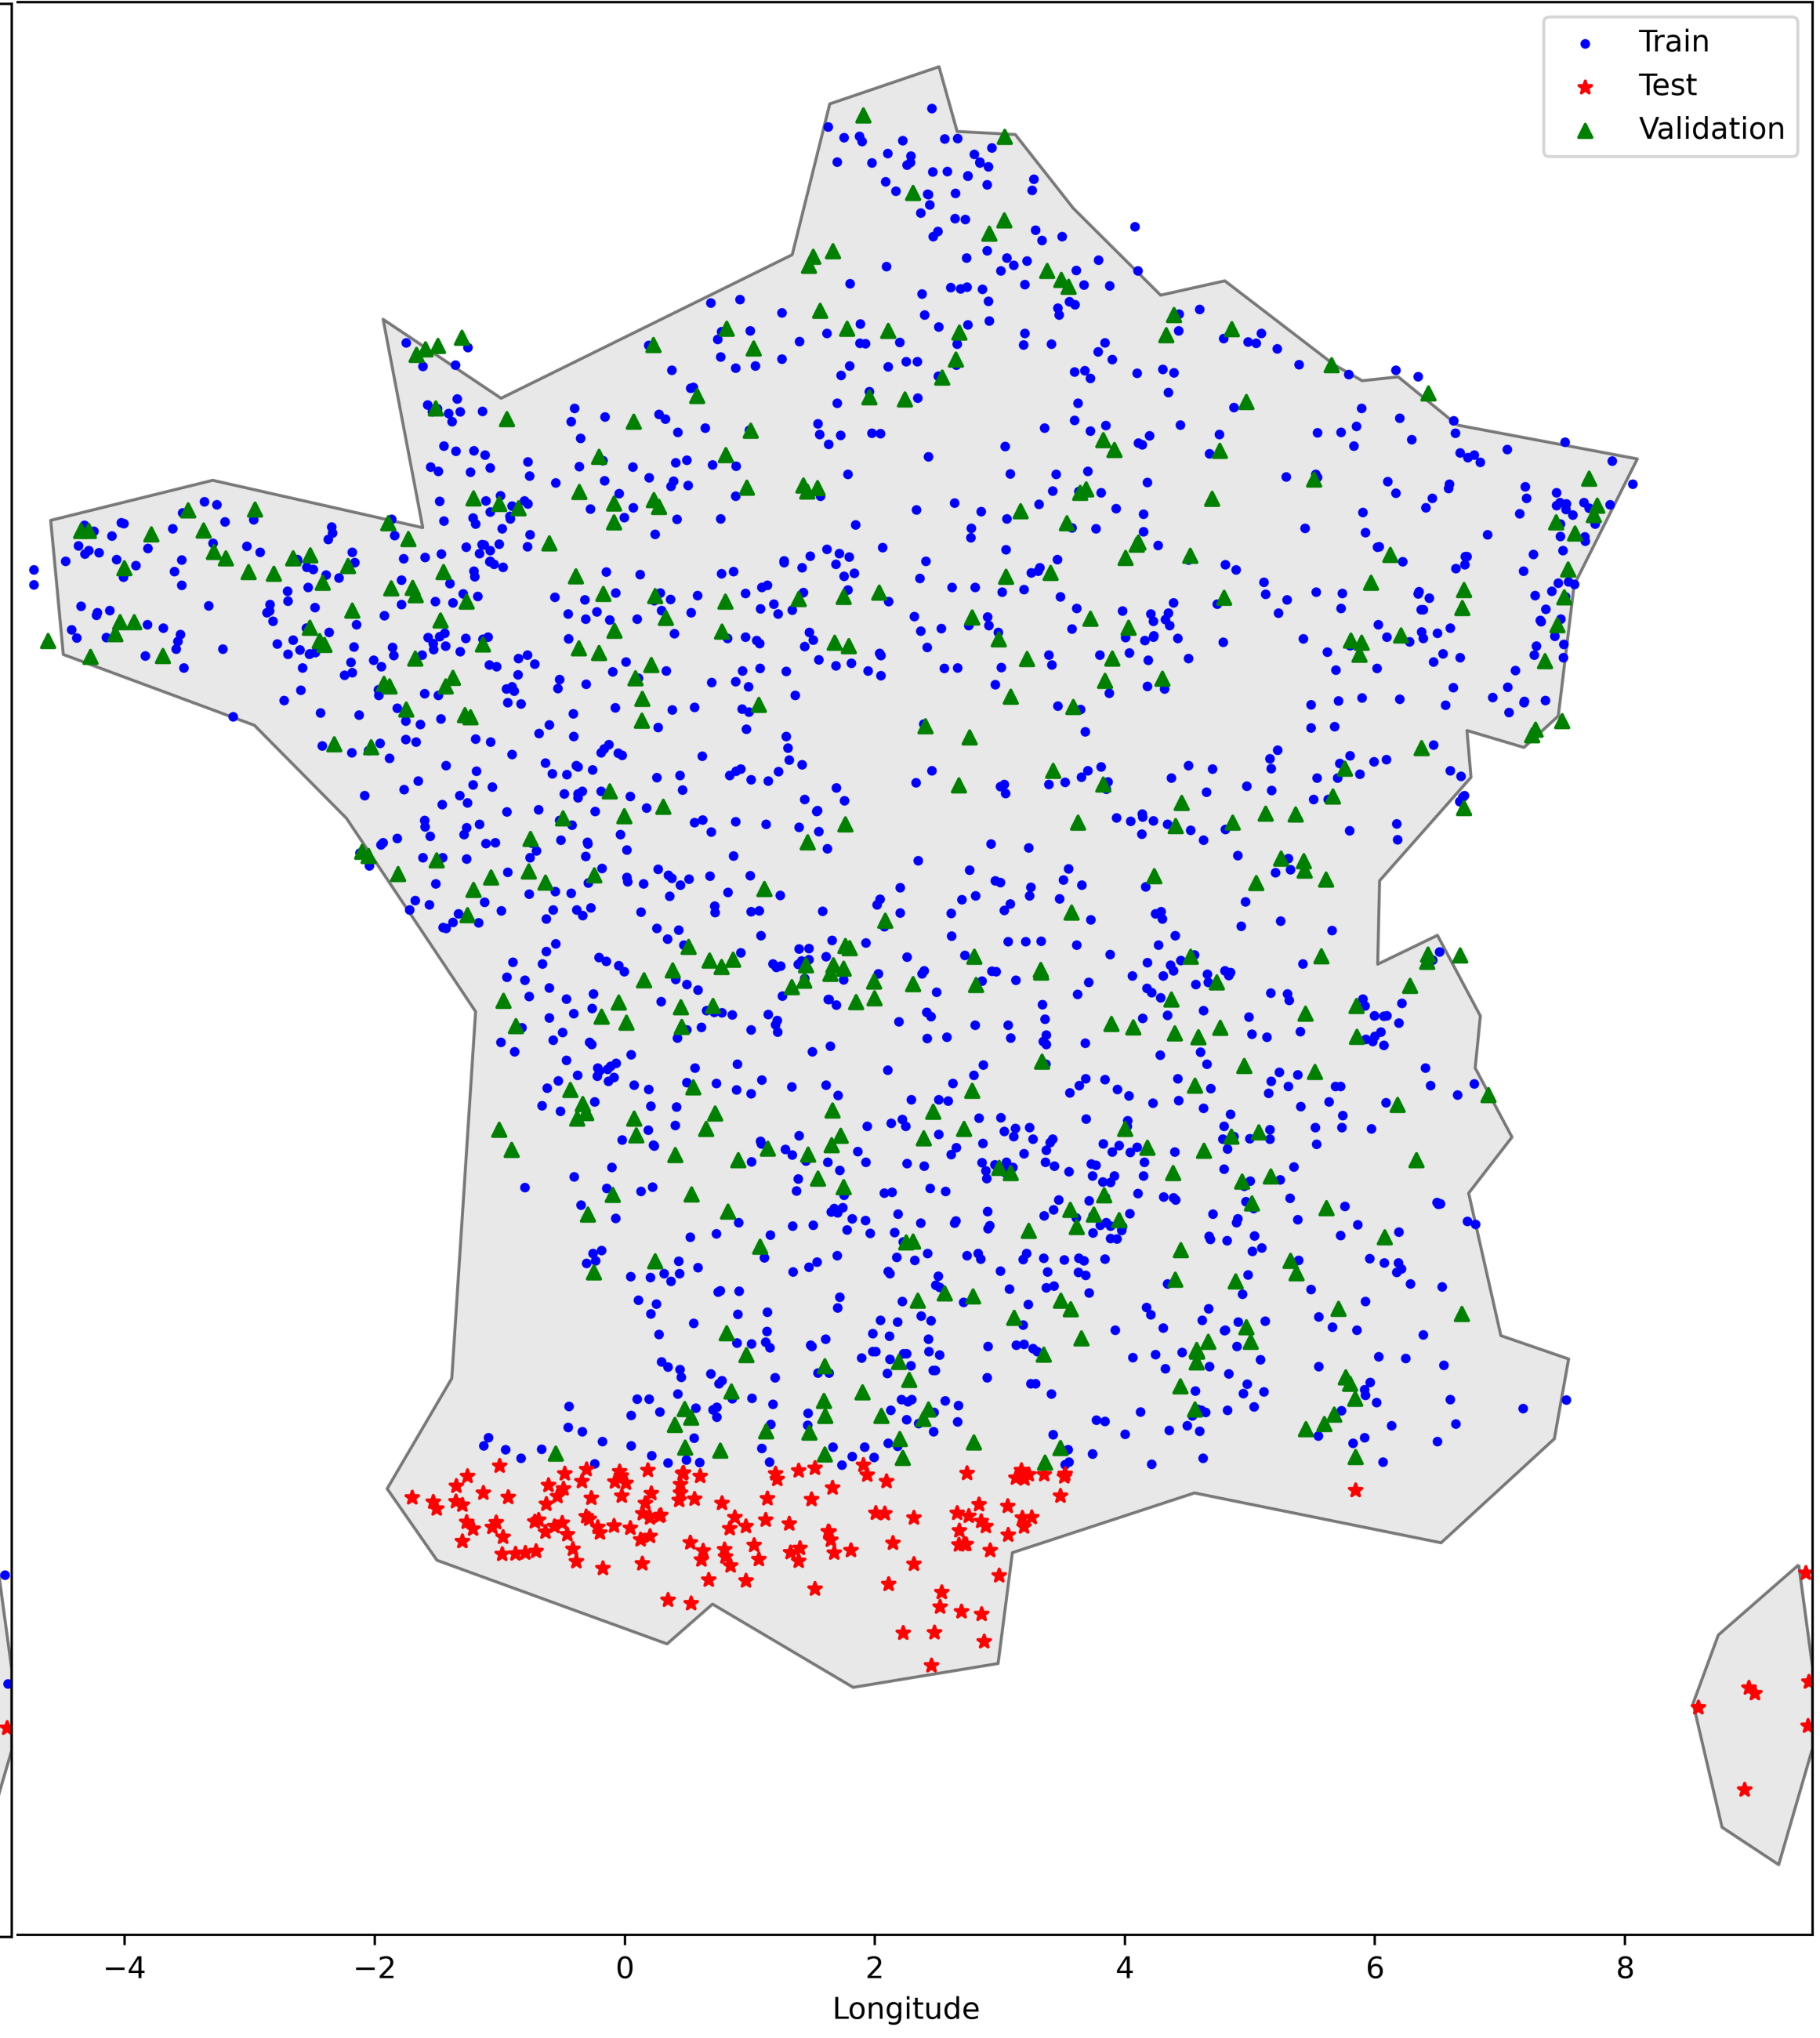

Supplement: supplementary_material [file attachment]

Test IoU (ID Split)

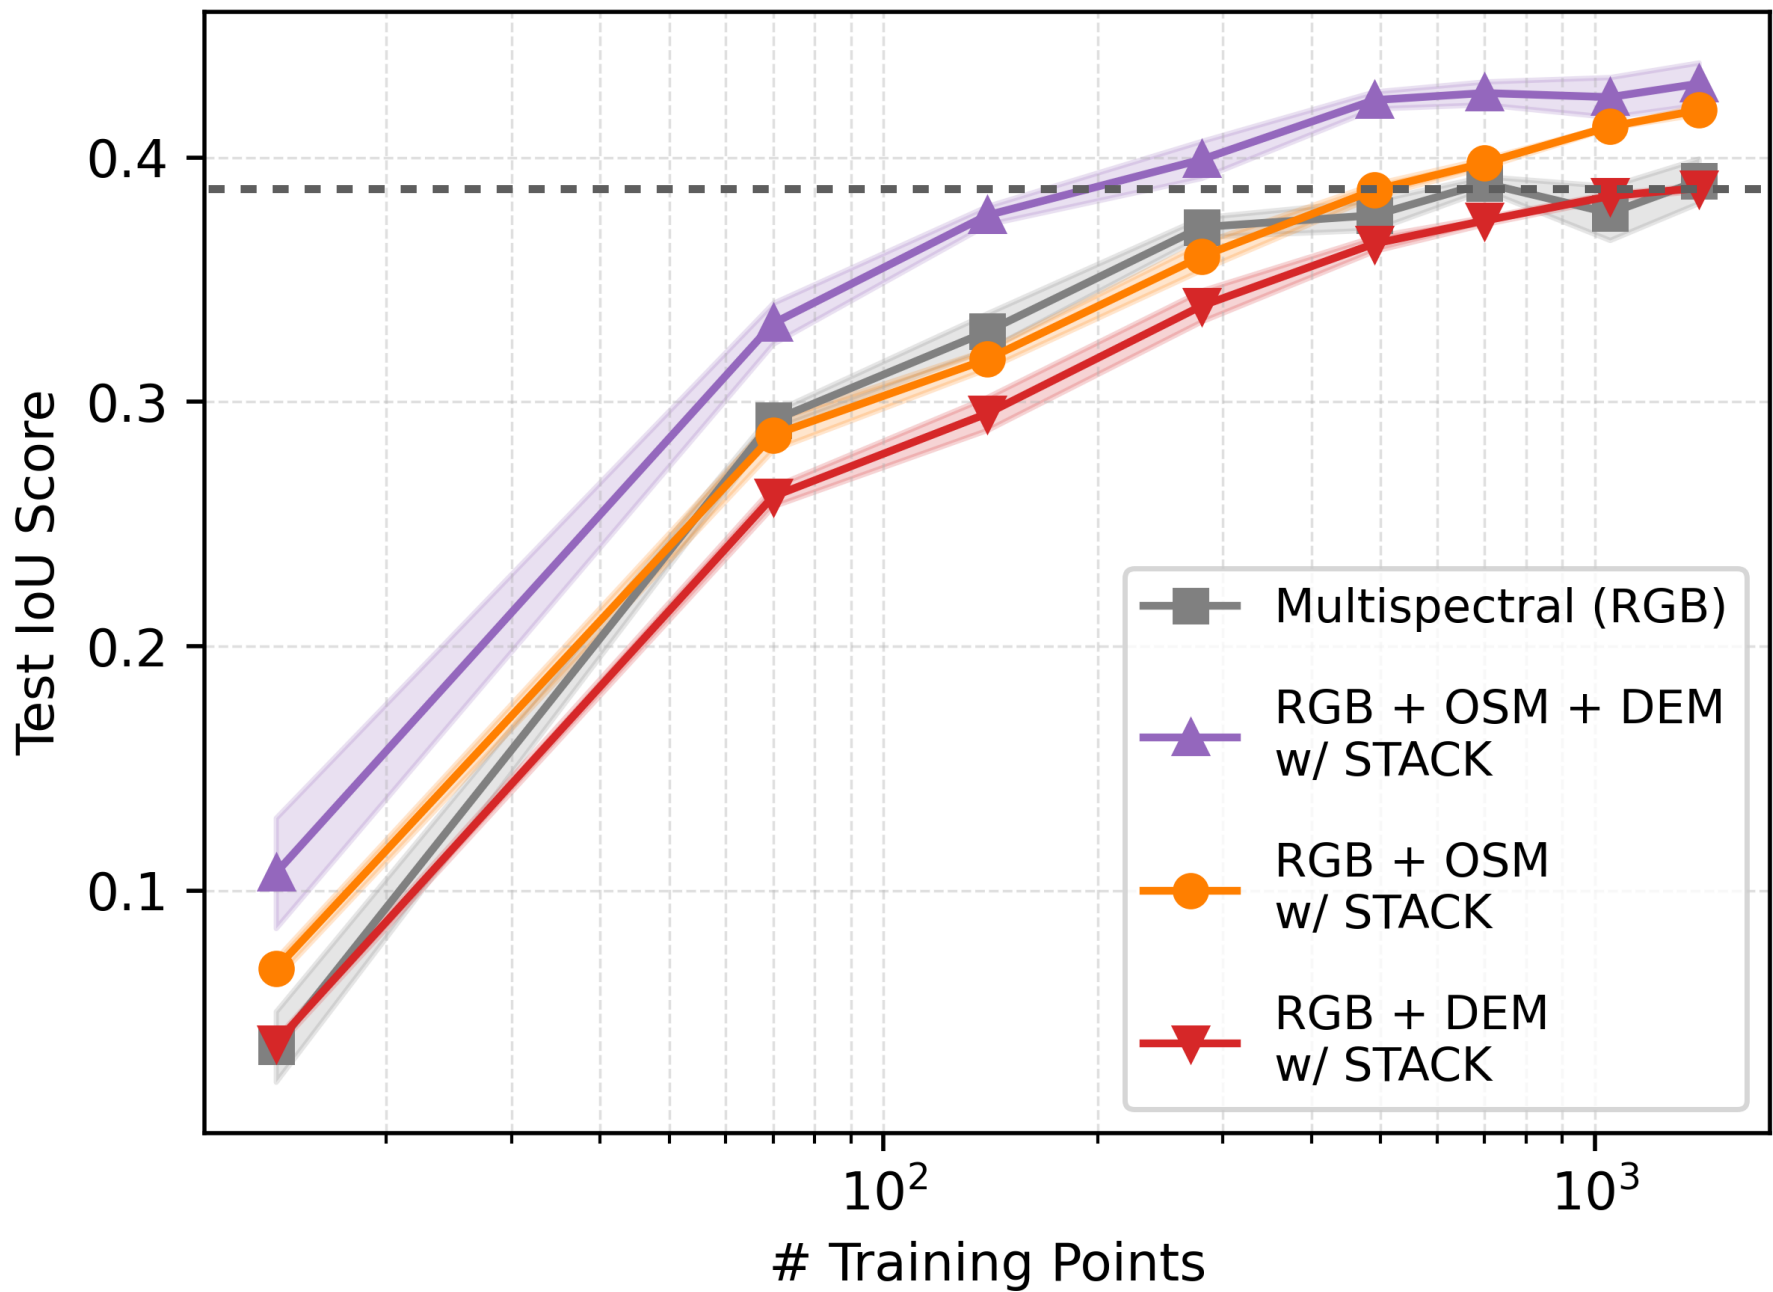

Supplement: supplementary_material [file attachment]

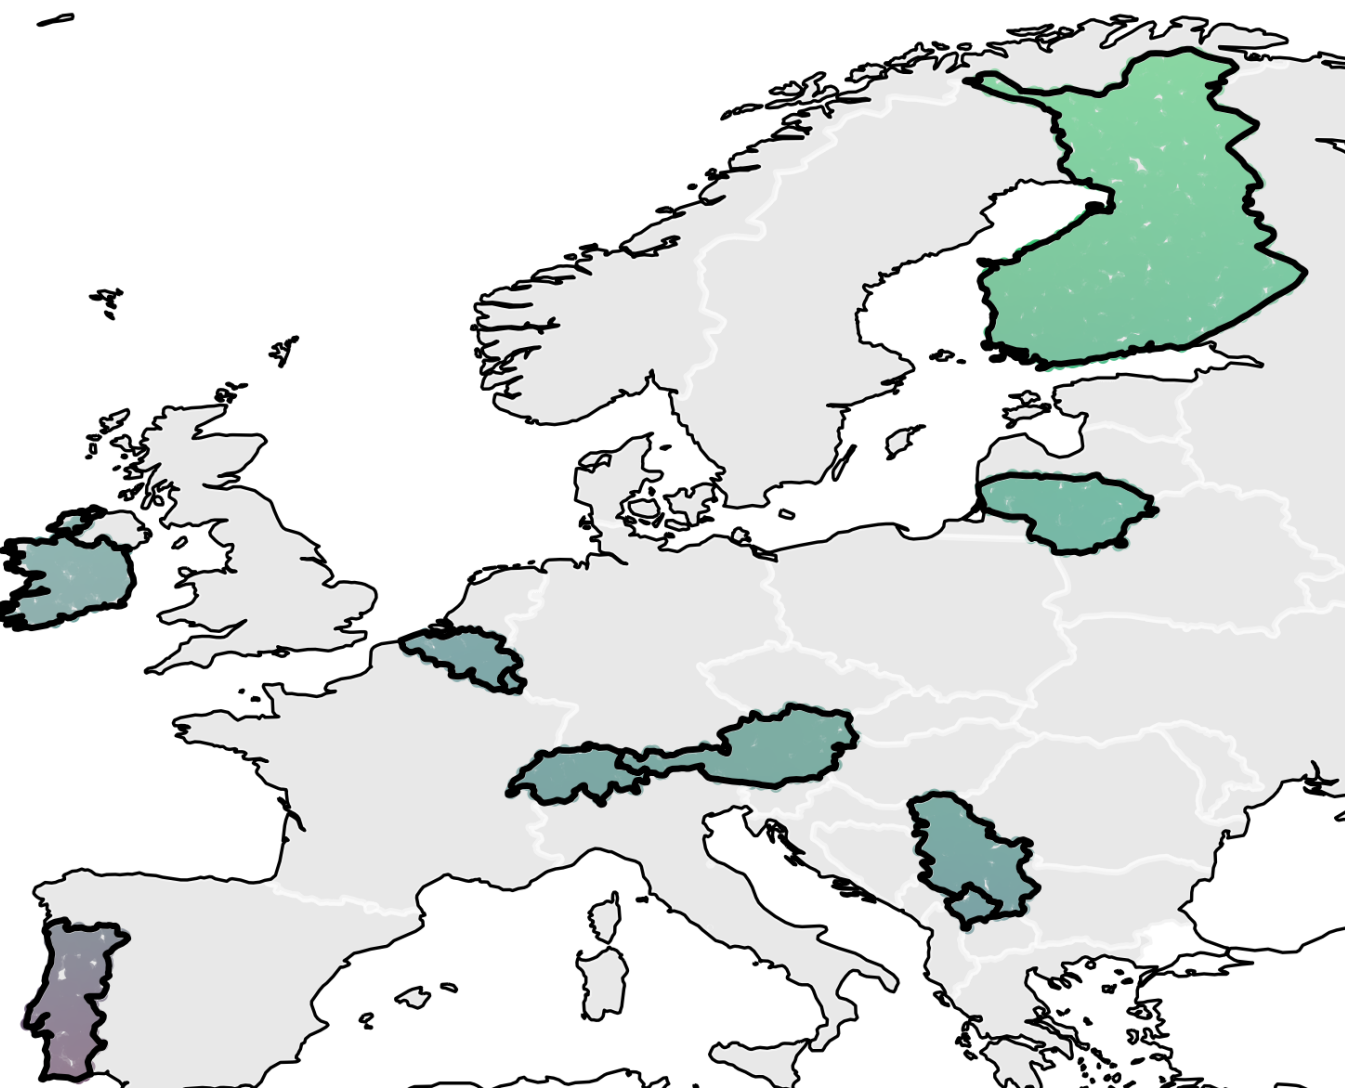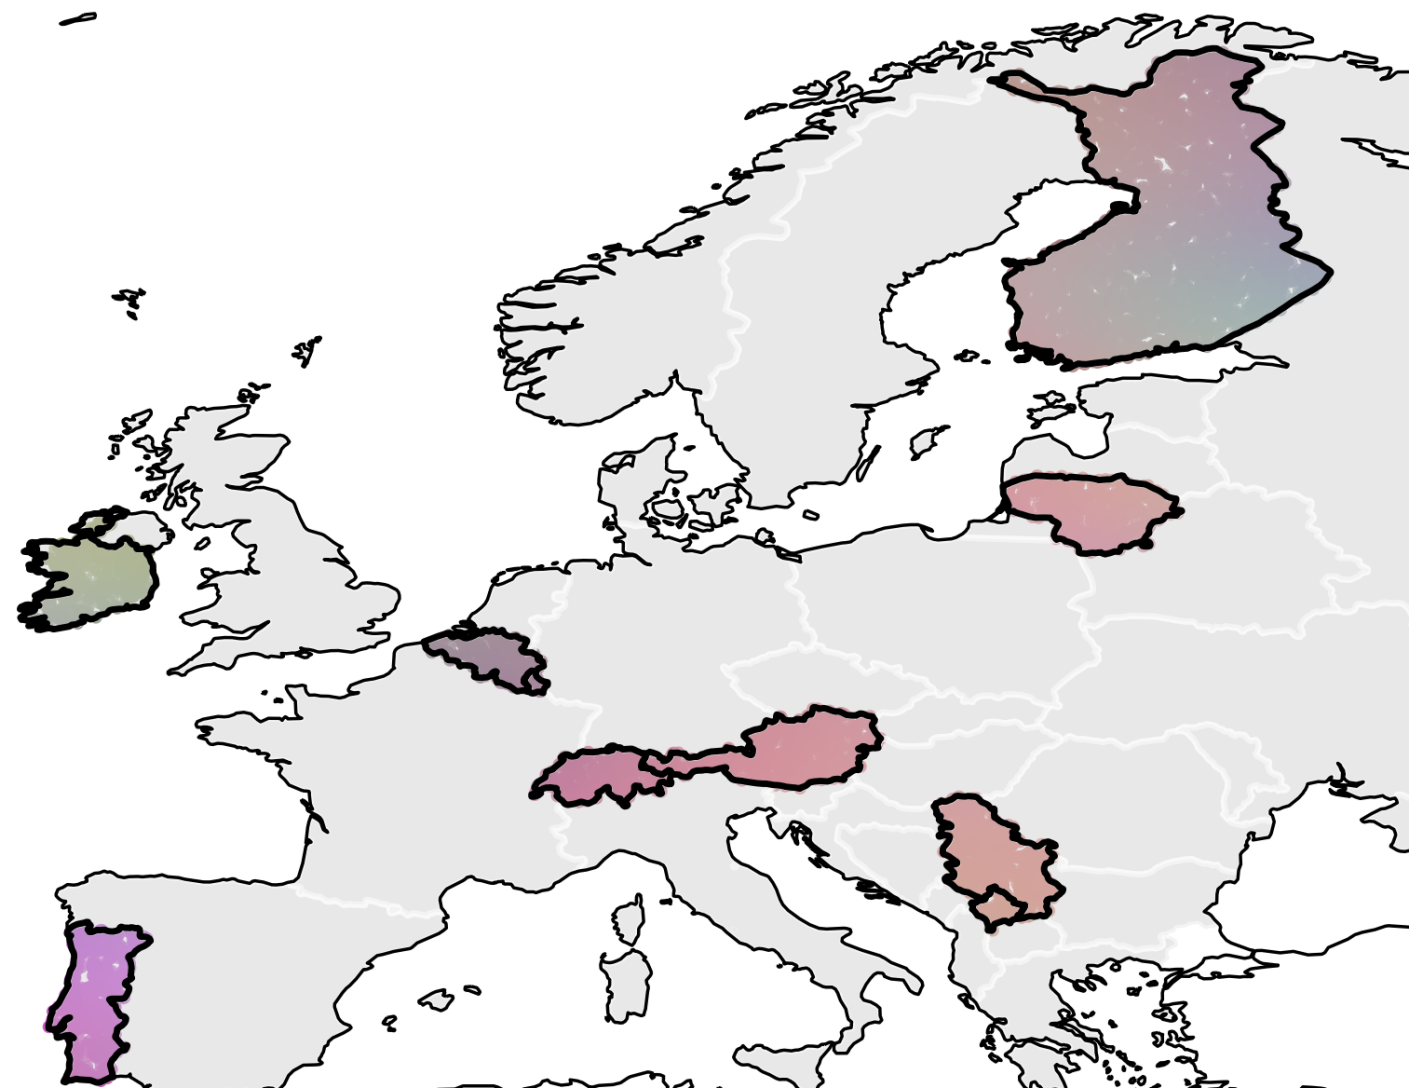

Supplement: supplementary_material [file attachment]

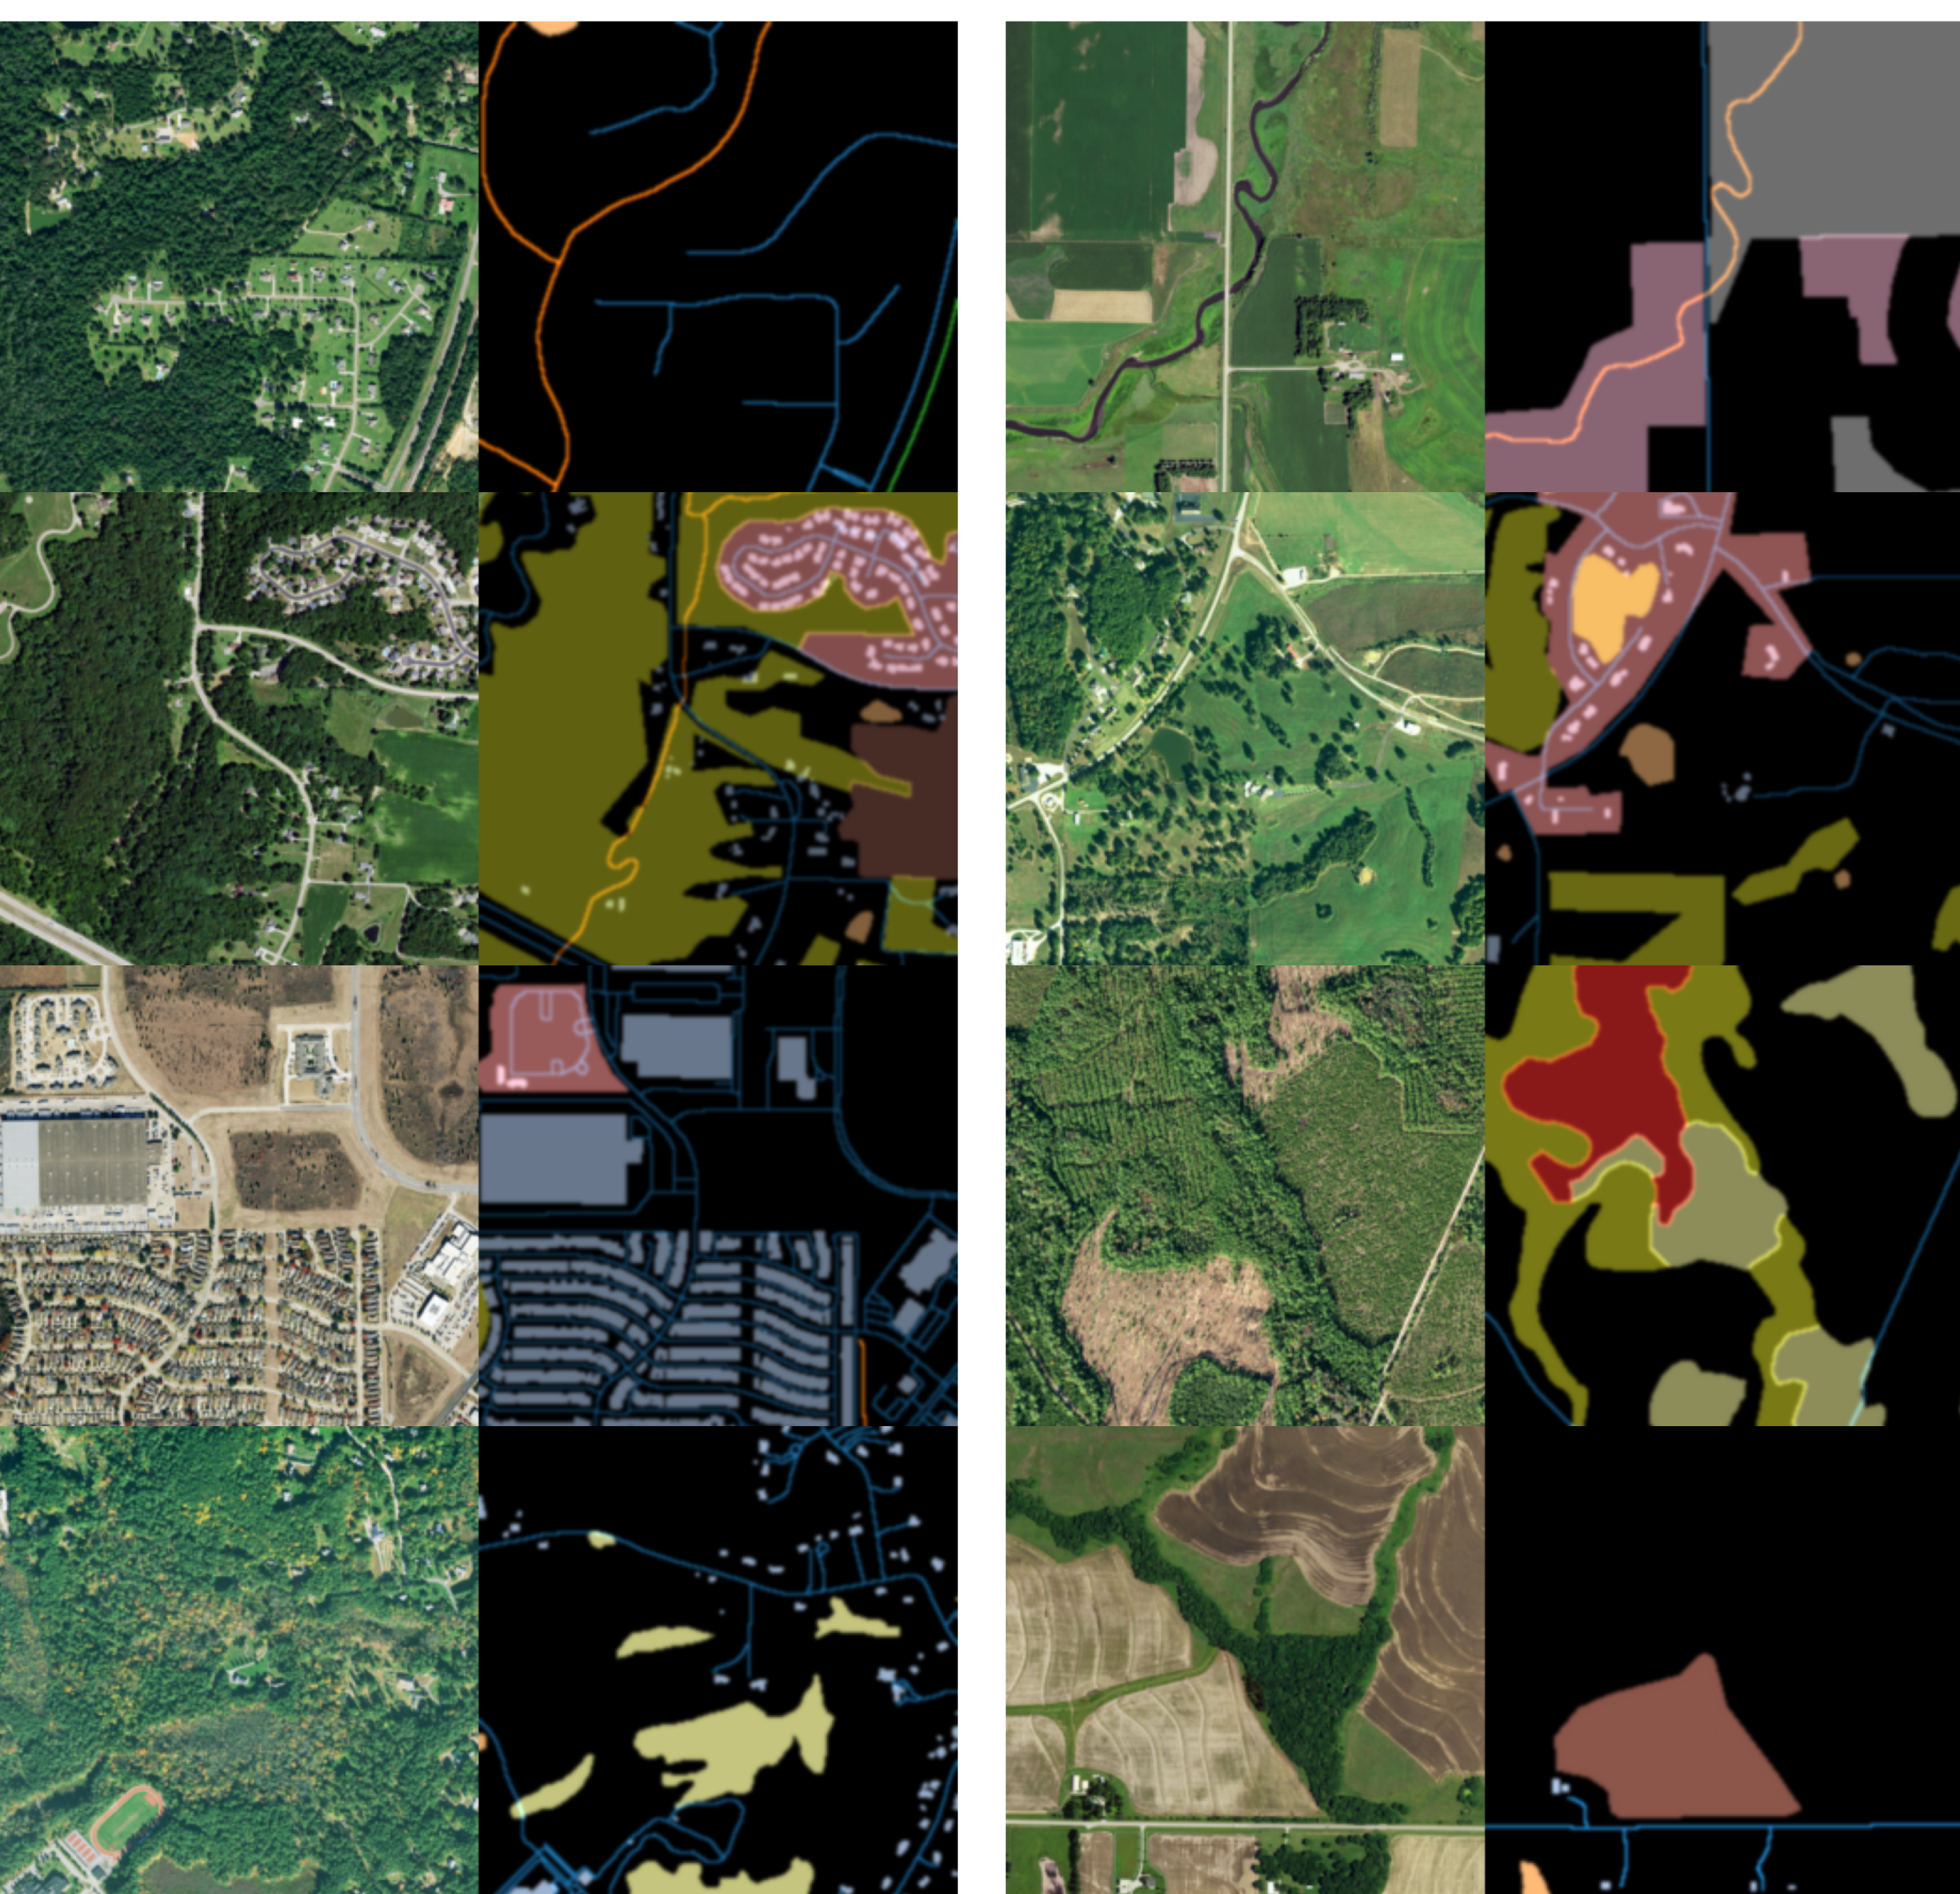

Supplement: supplementary_material [file attachment]

# Test IoU (ID Split)

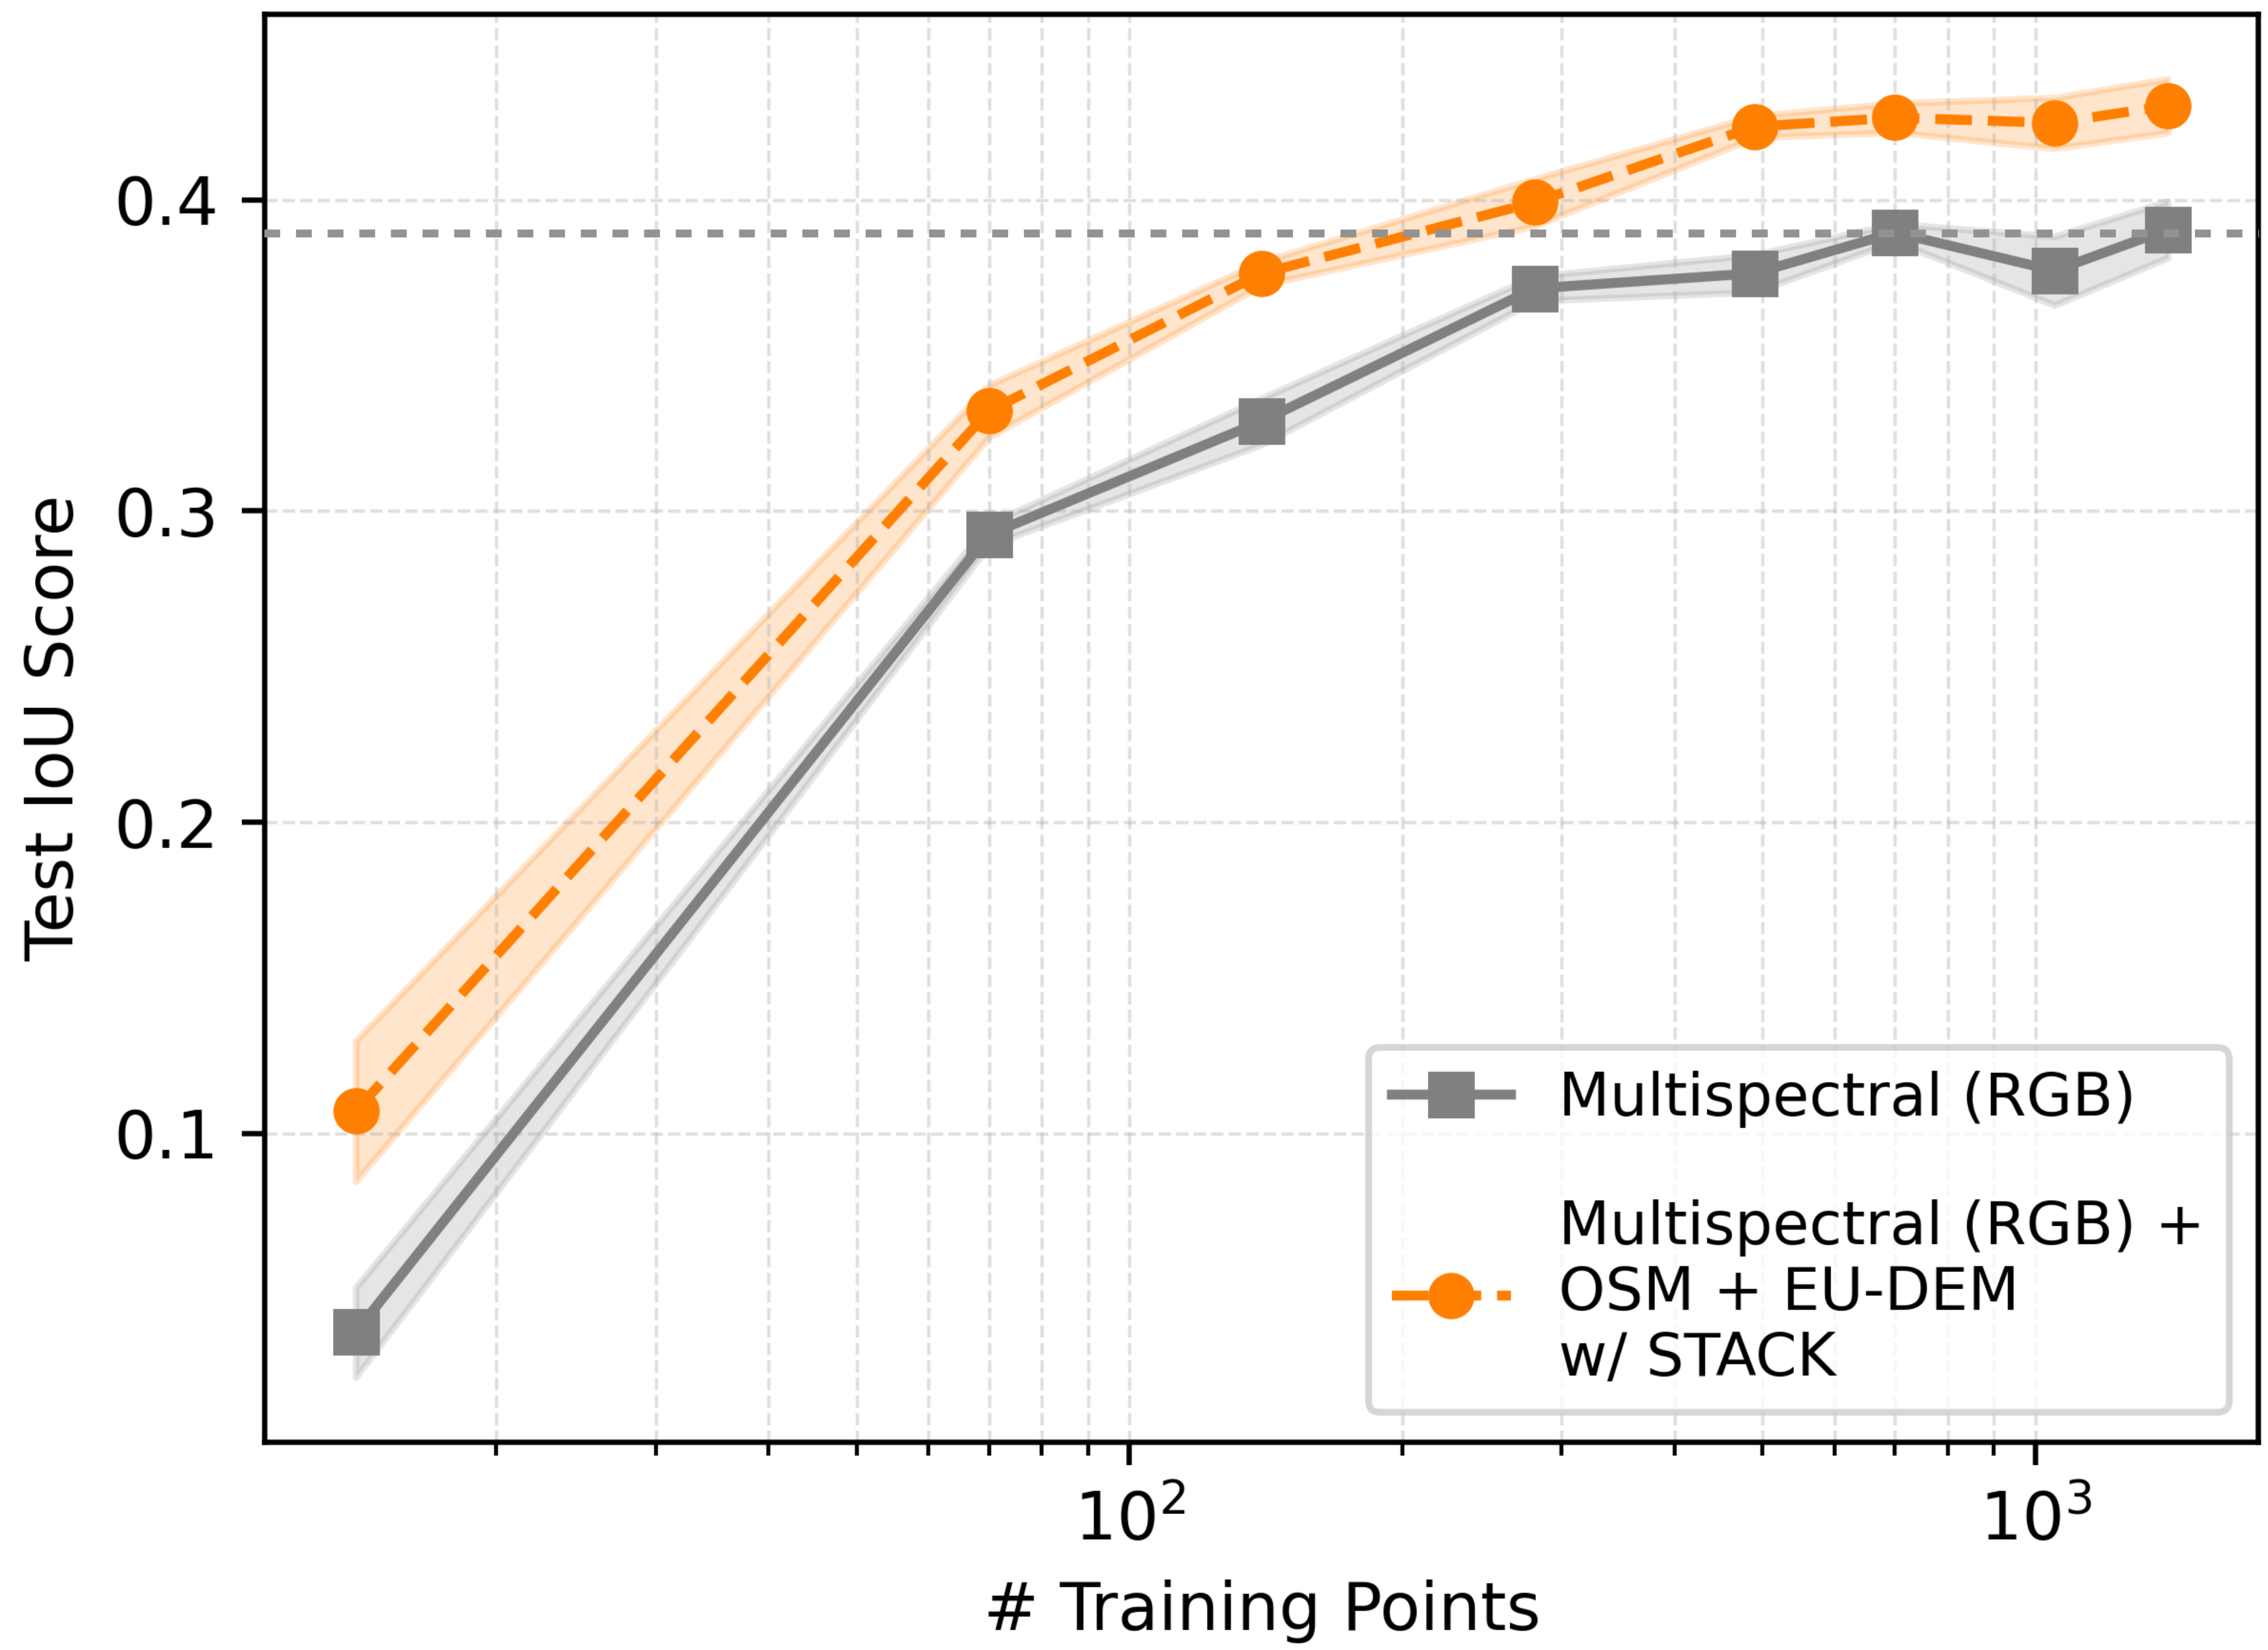

Supplement: supplementary_material [file attachment]

Test Dice (ID Split)

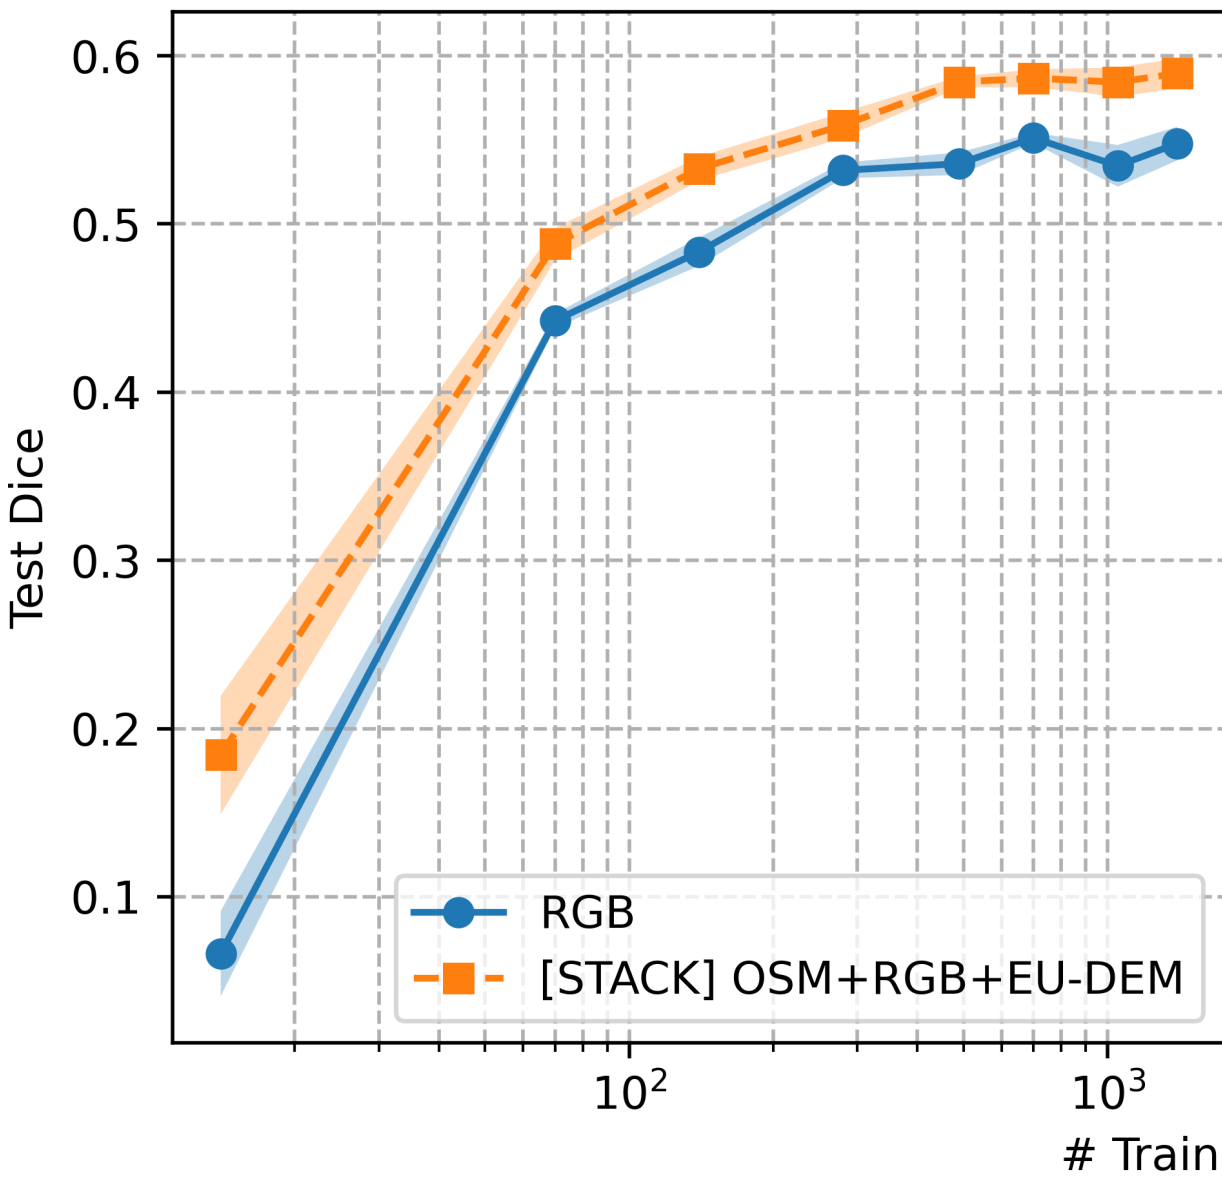

Test IoU (ID Split)

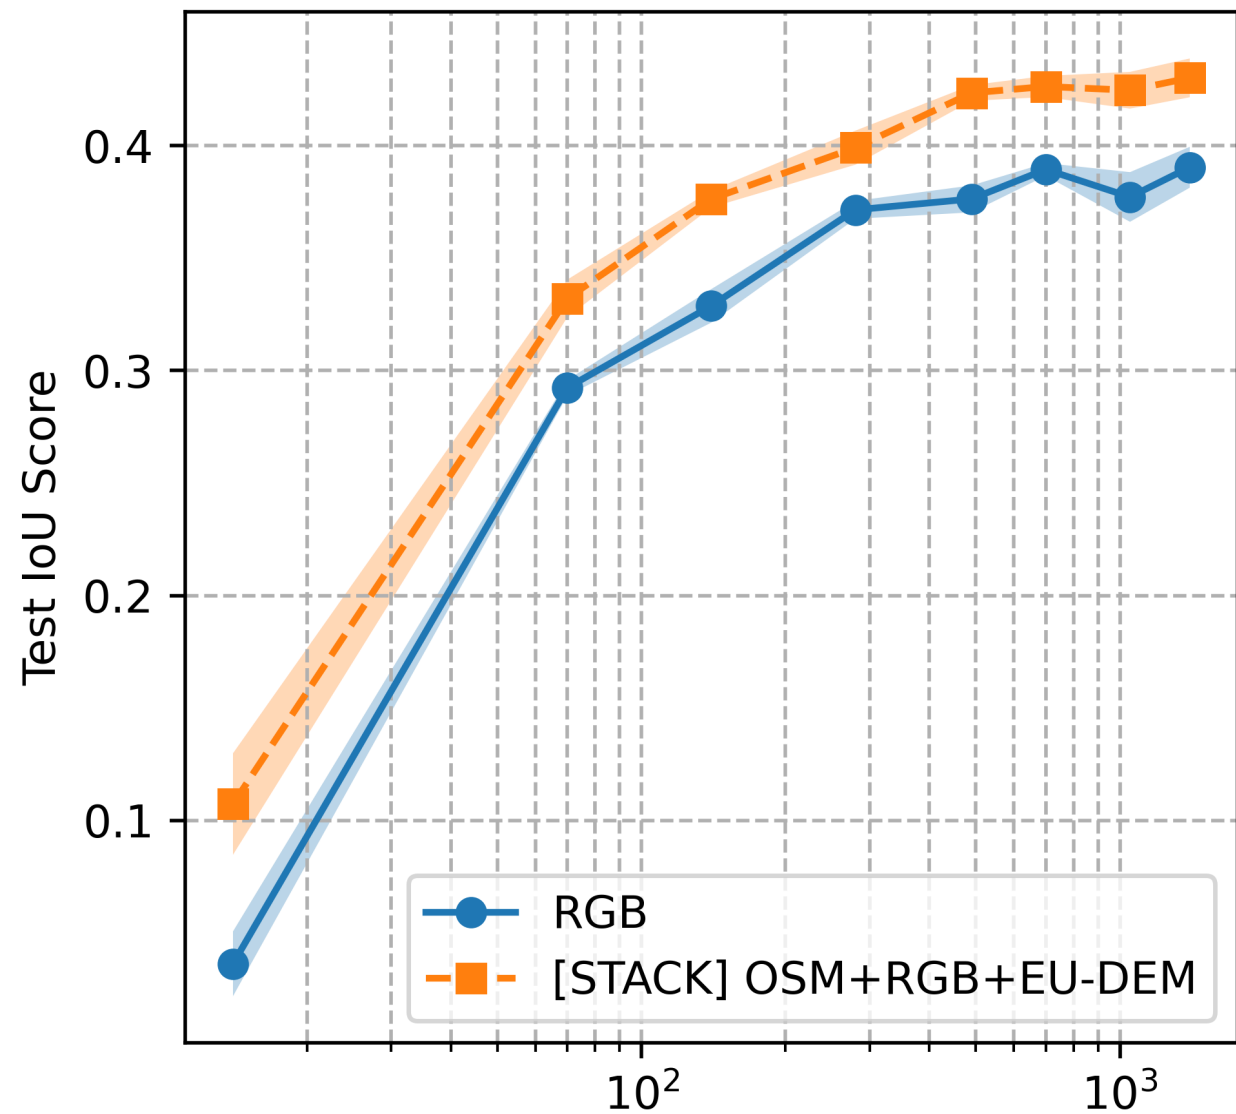

Supplement: supplementary_material [file attachment]

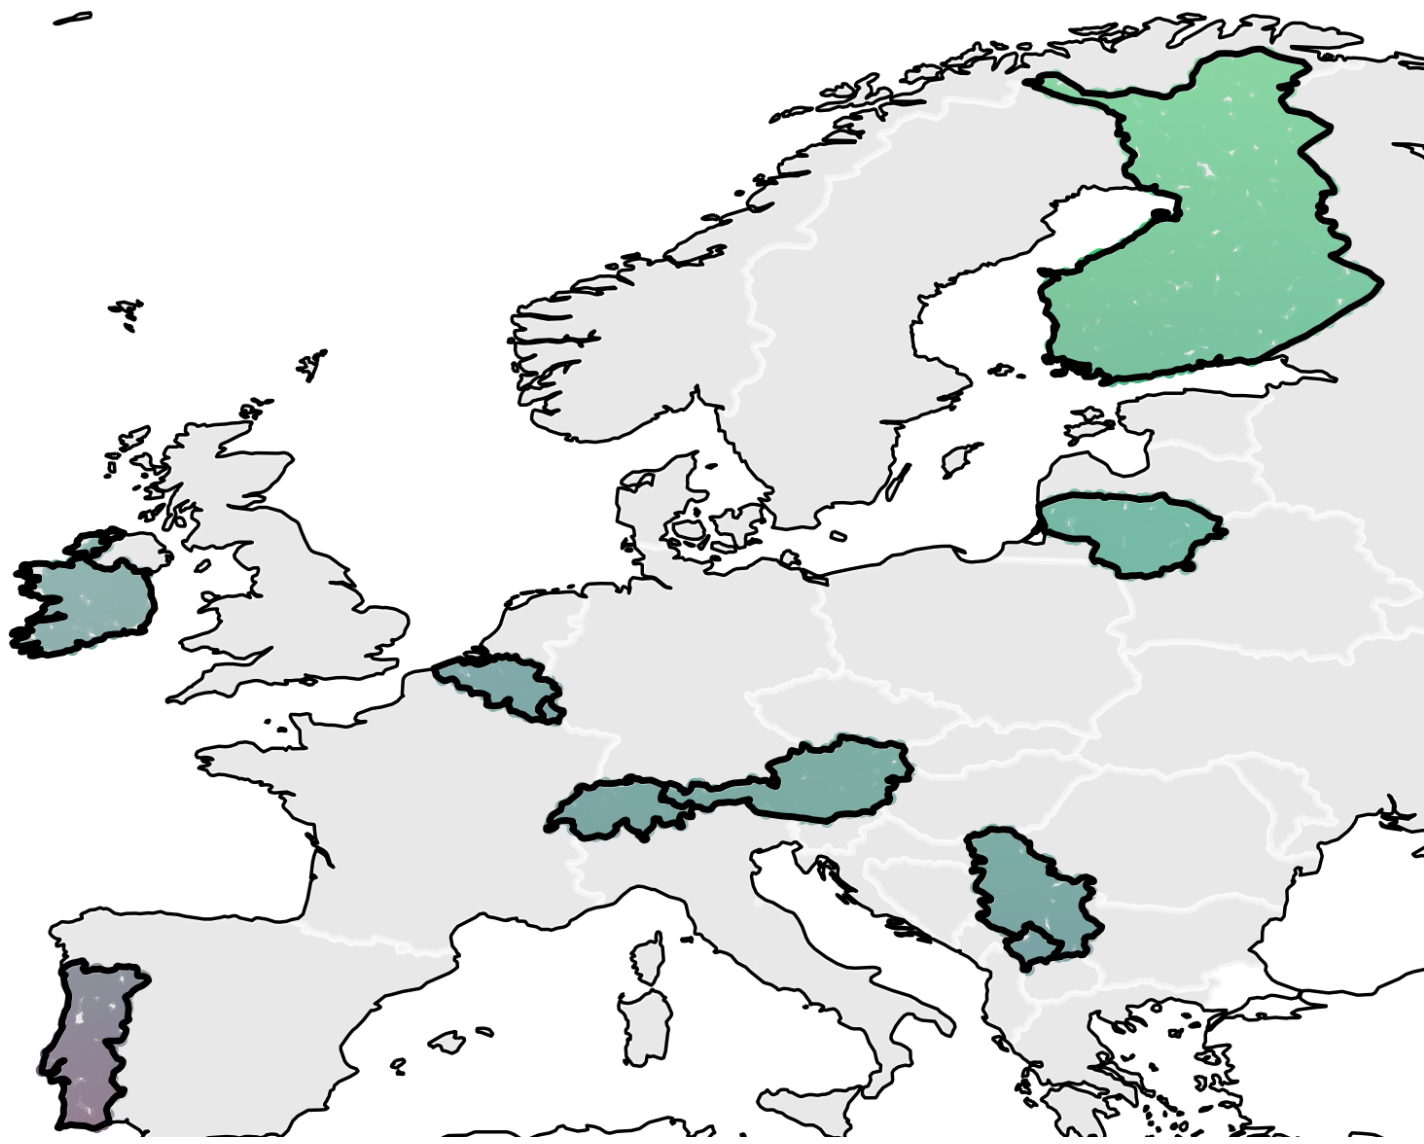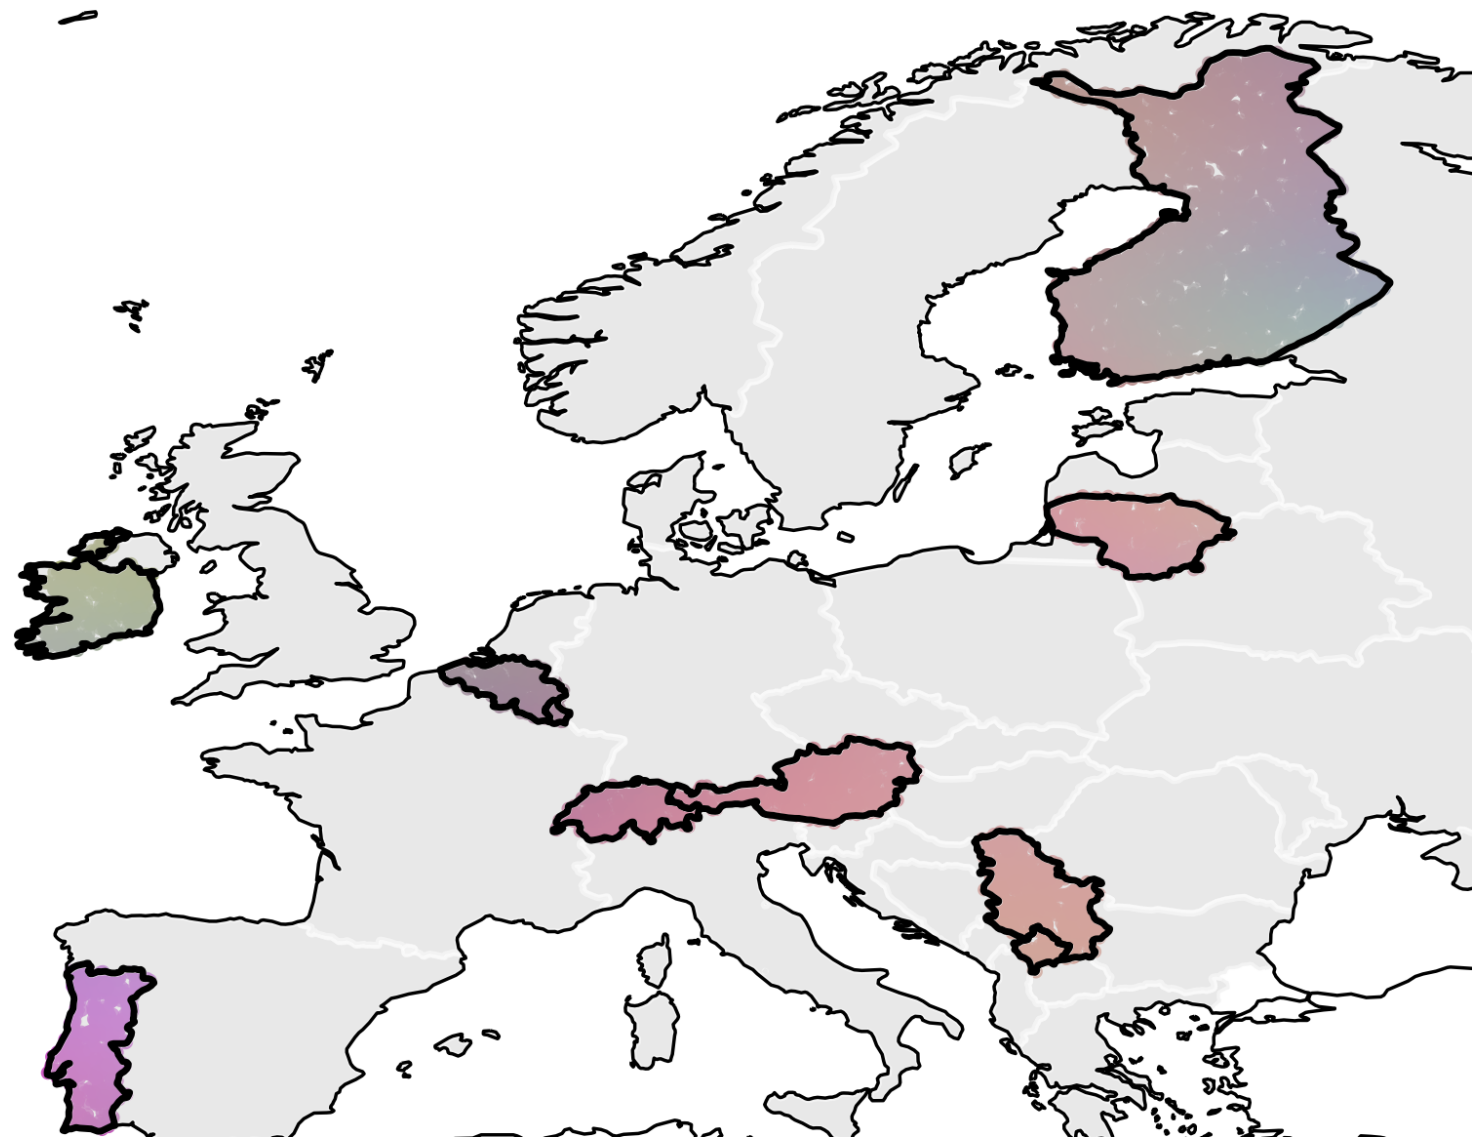

Supplement: supplementary_material [file attachment]

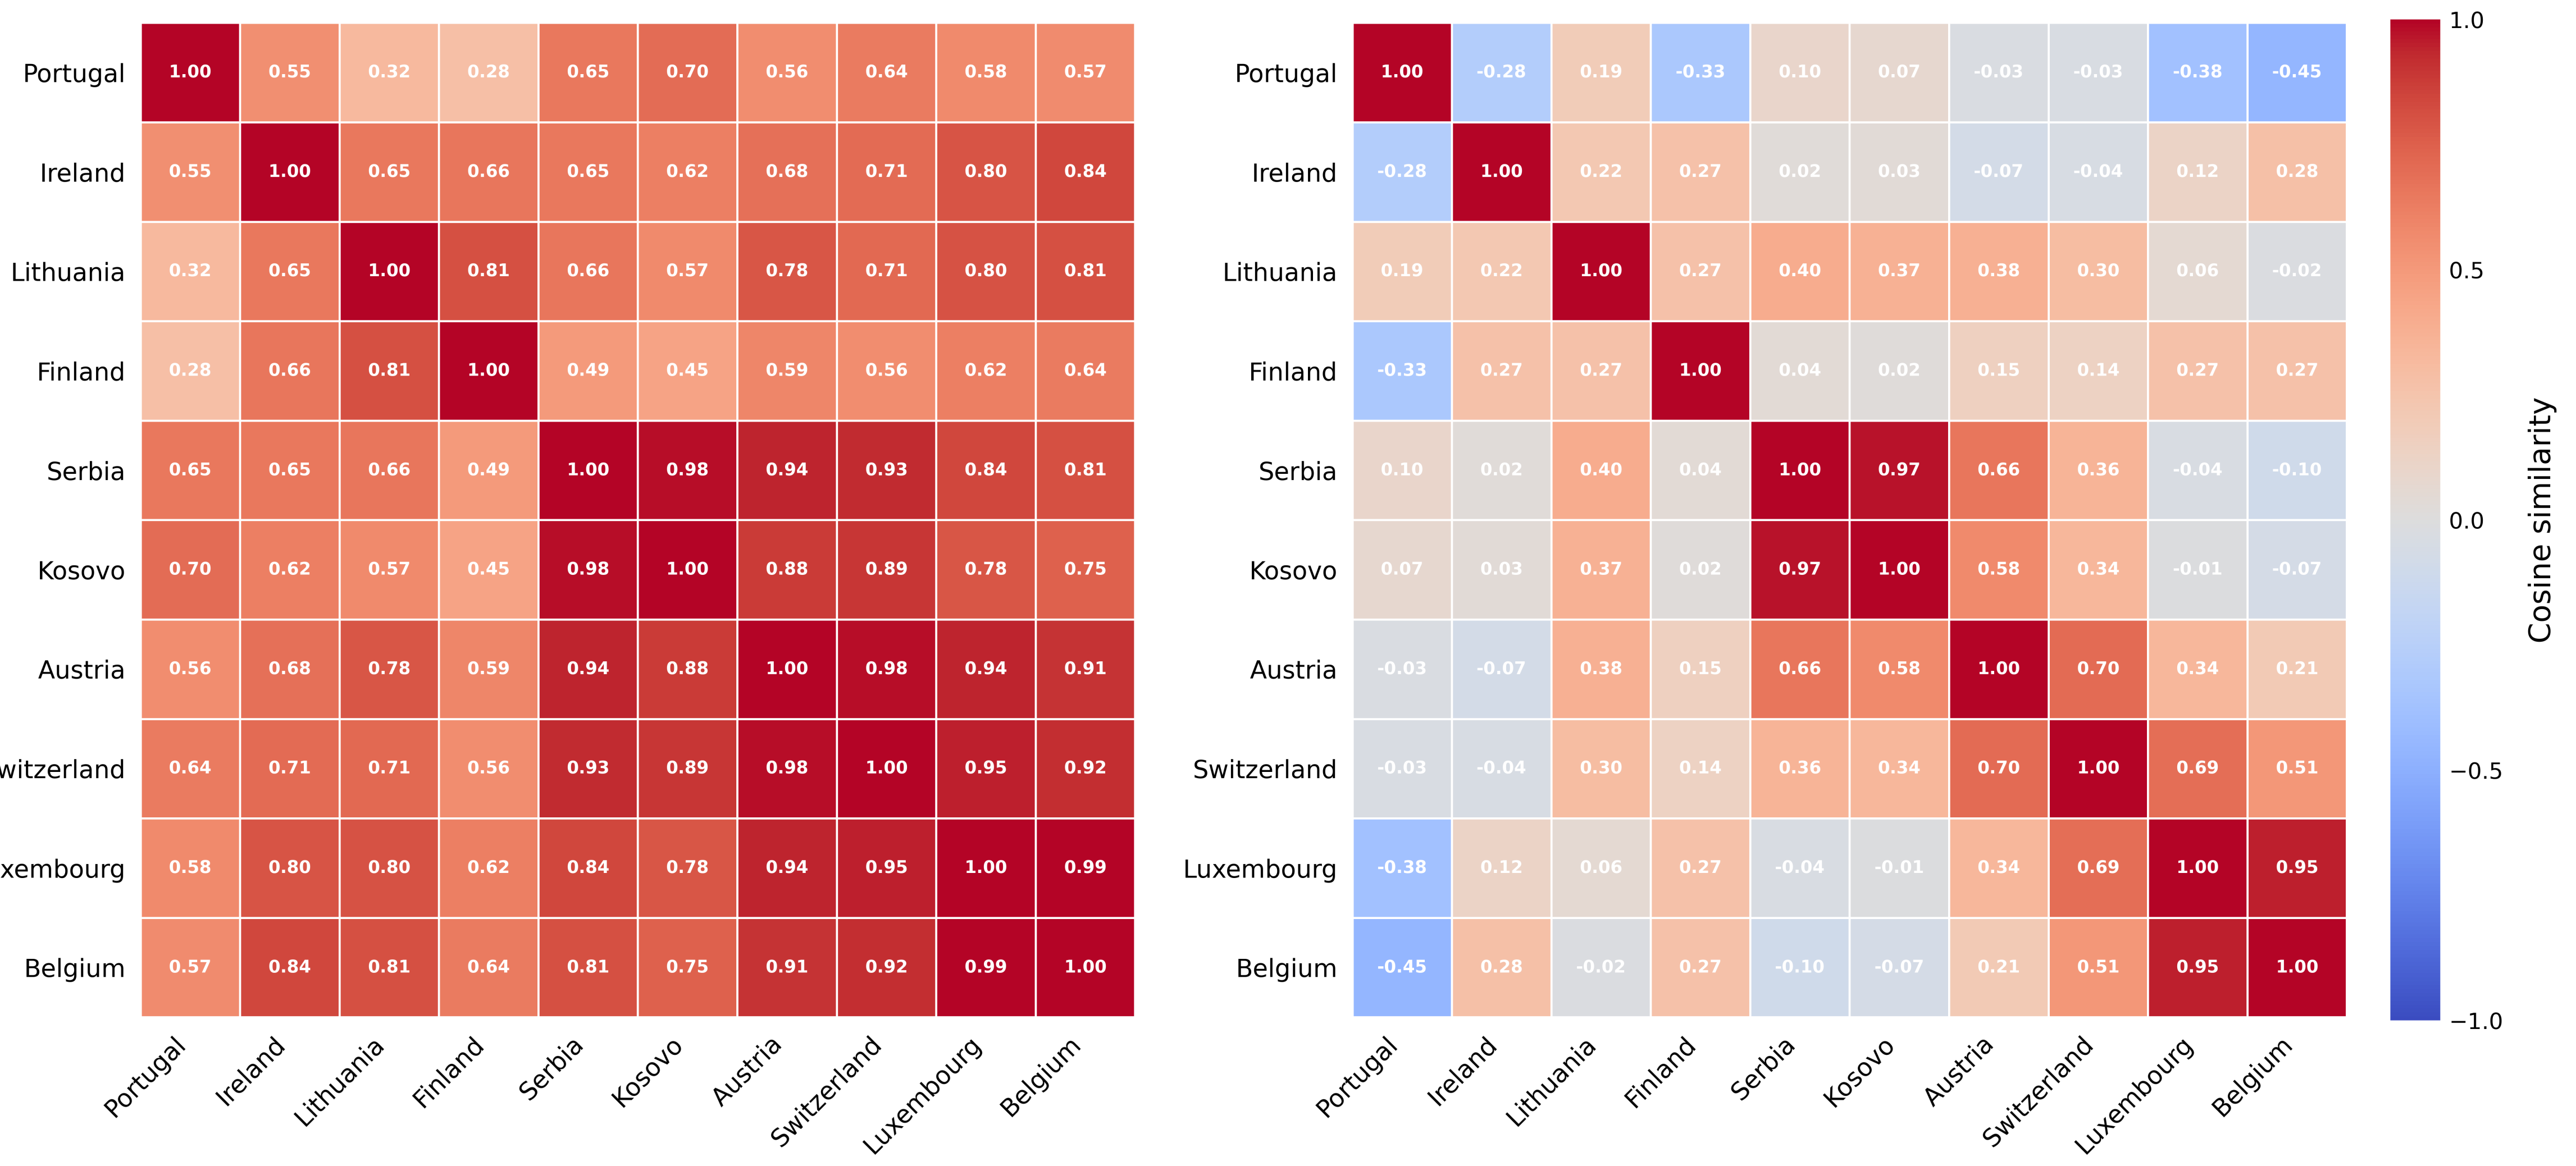

Supplement: supplementary_material [file attachment]

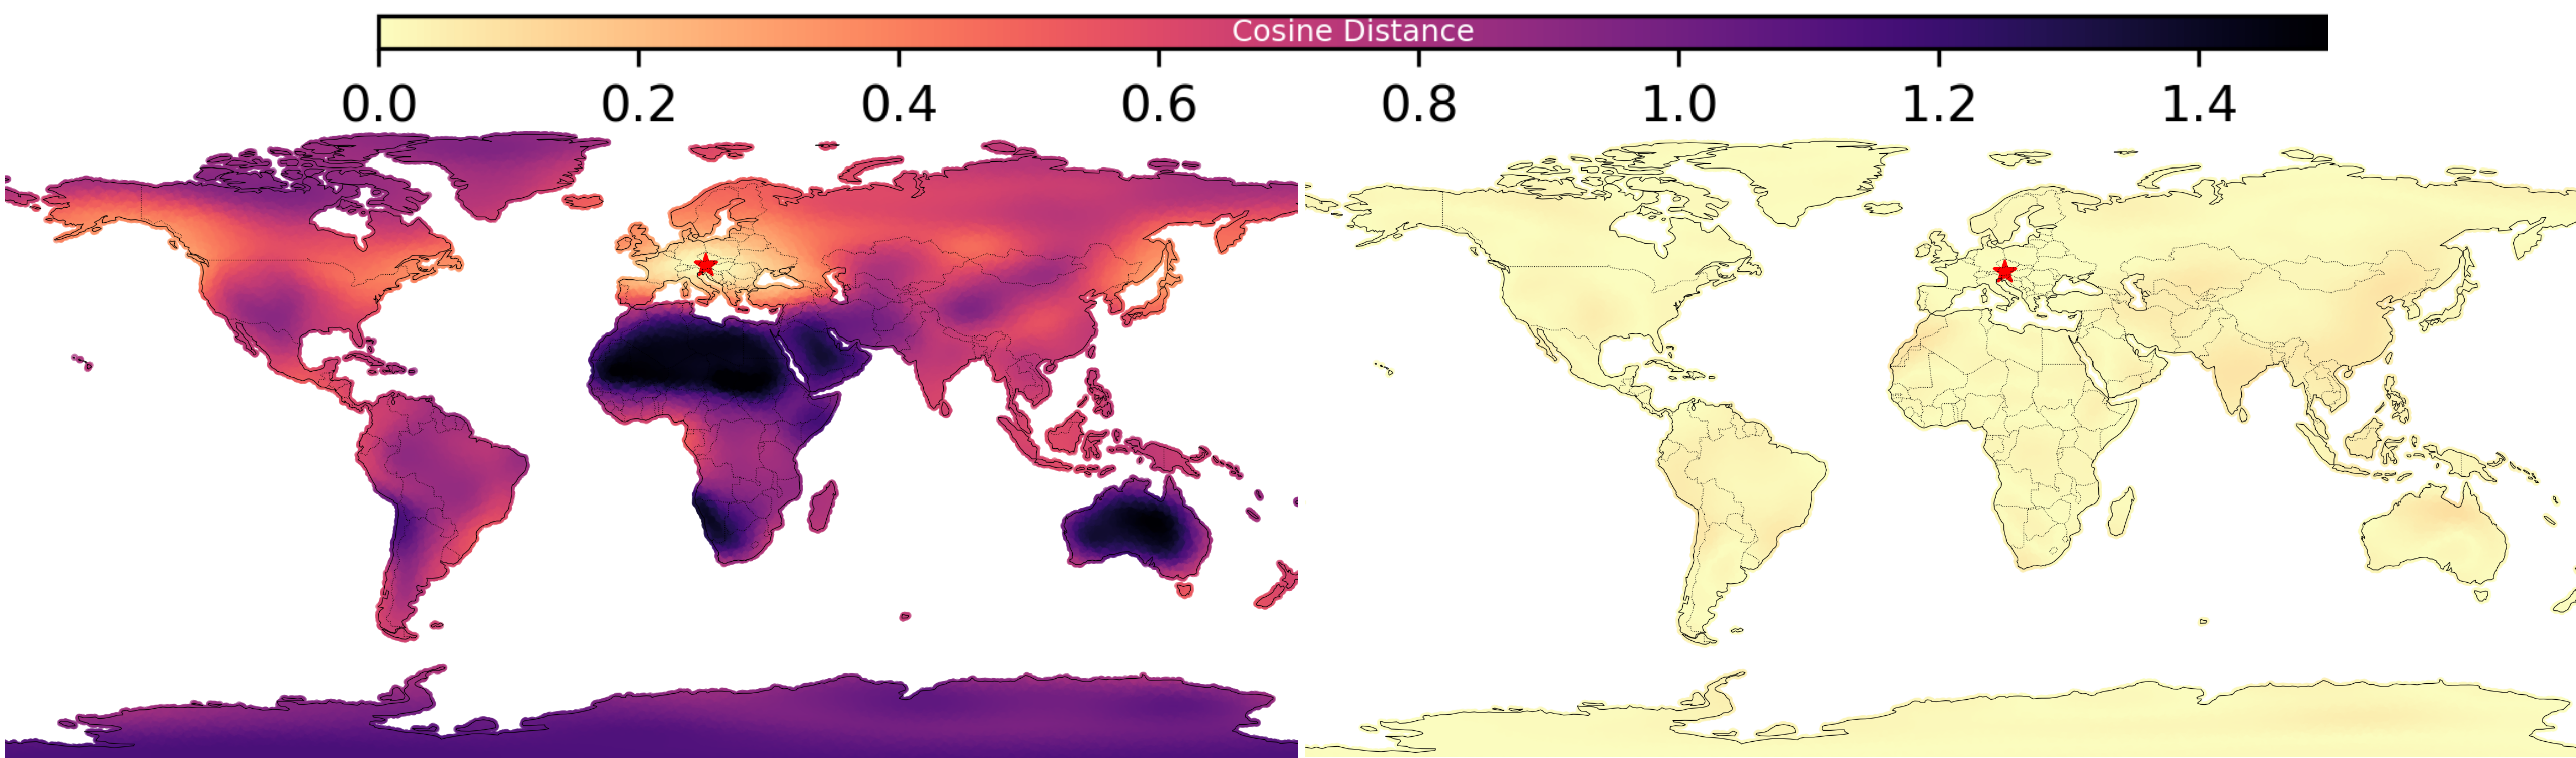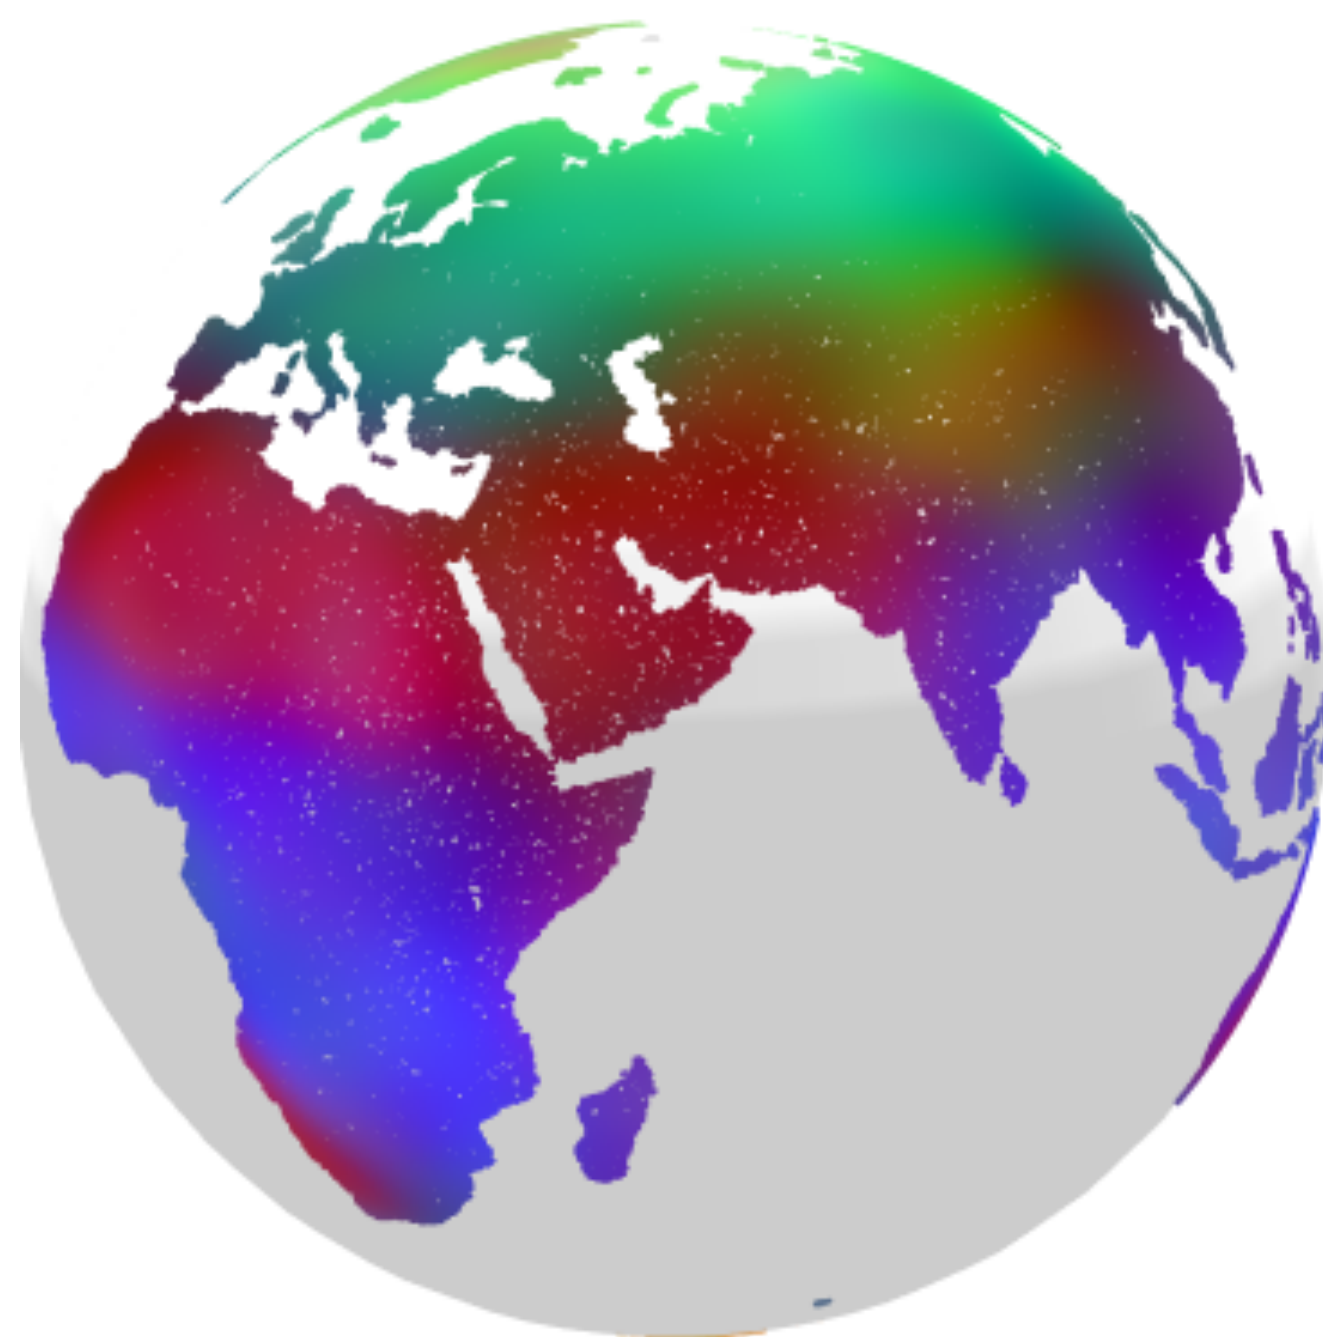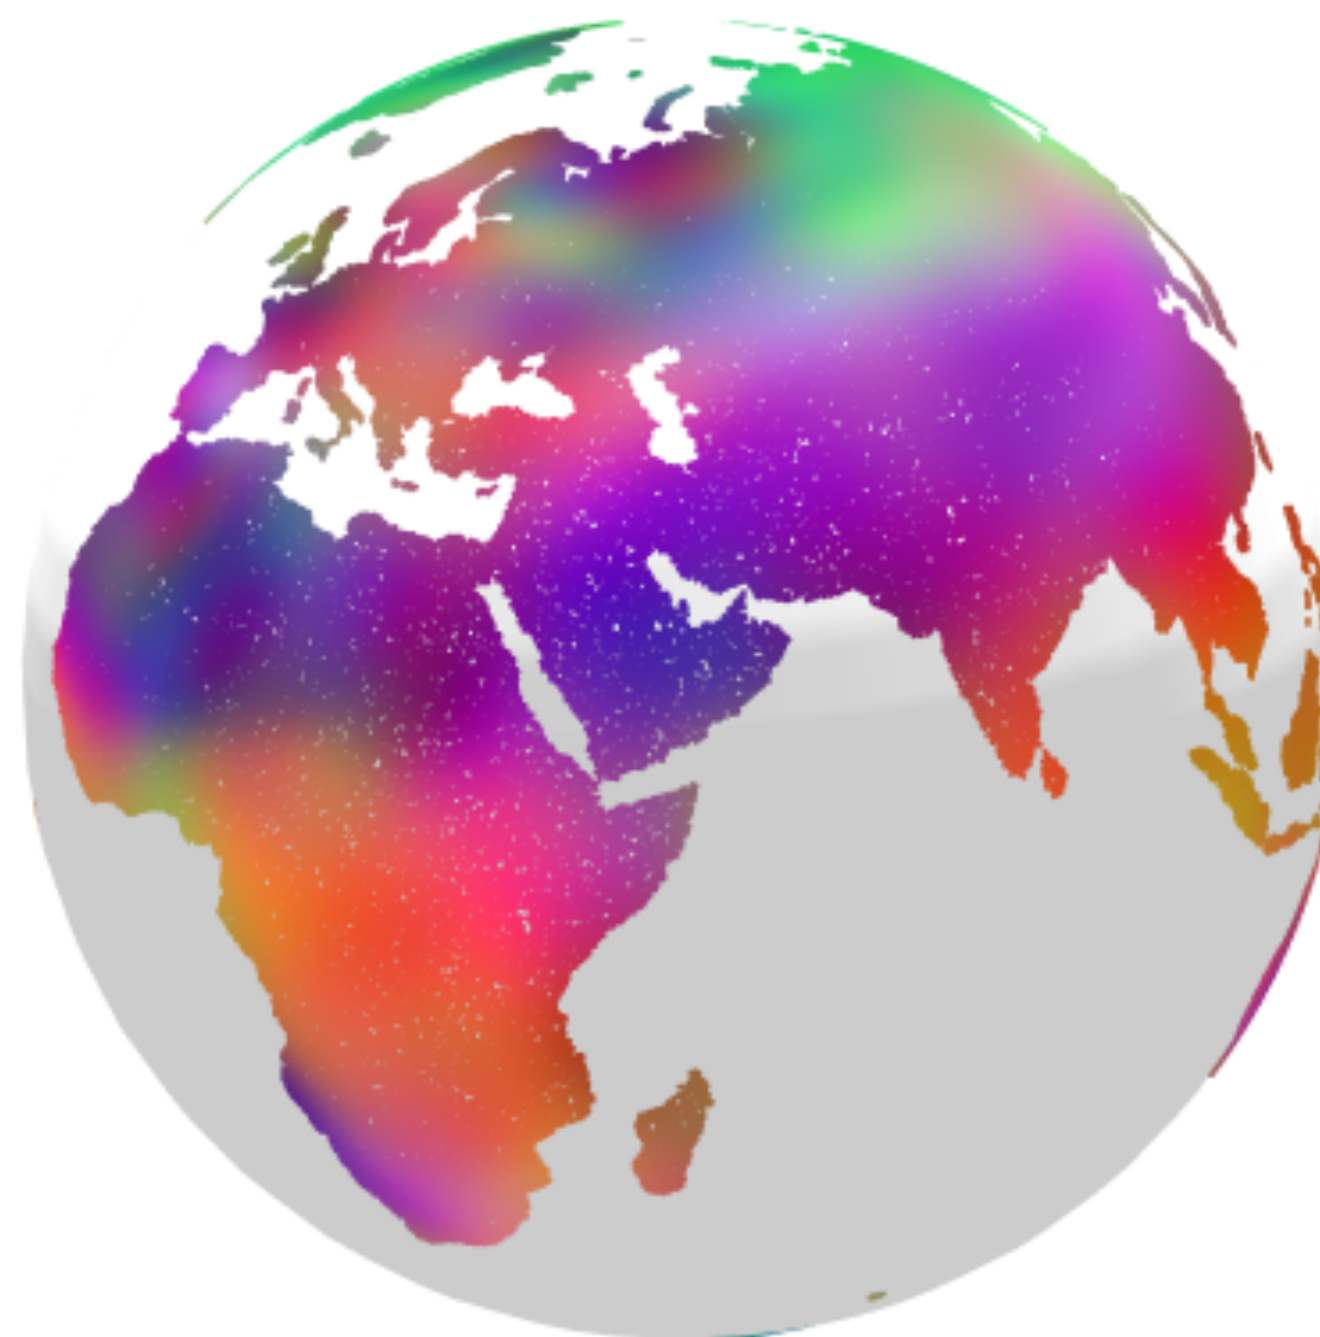

Supplement: supplementary_material [file attachment]

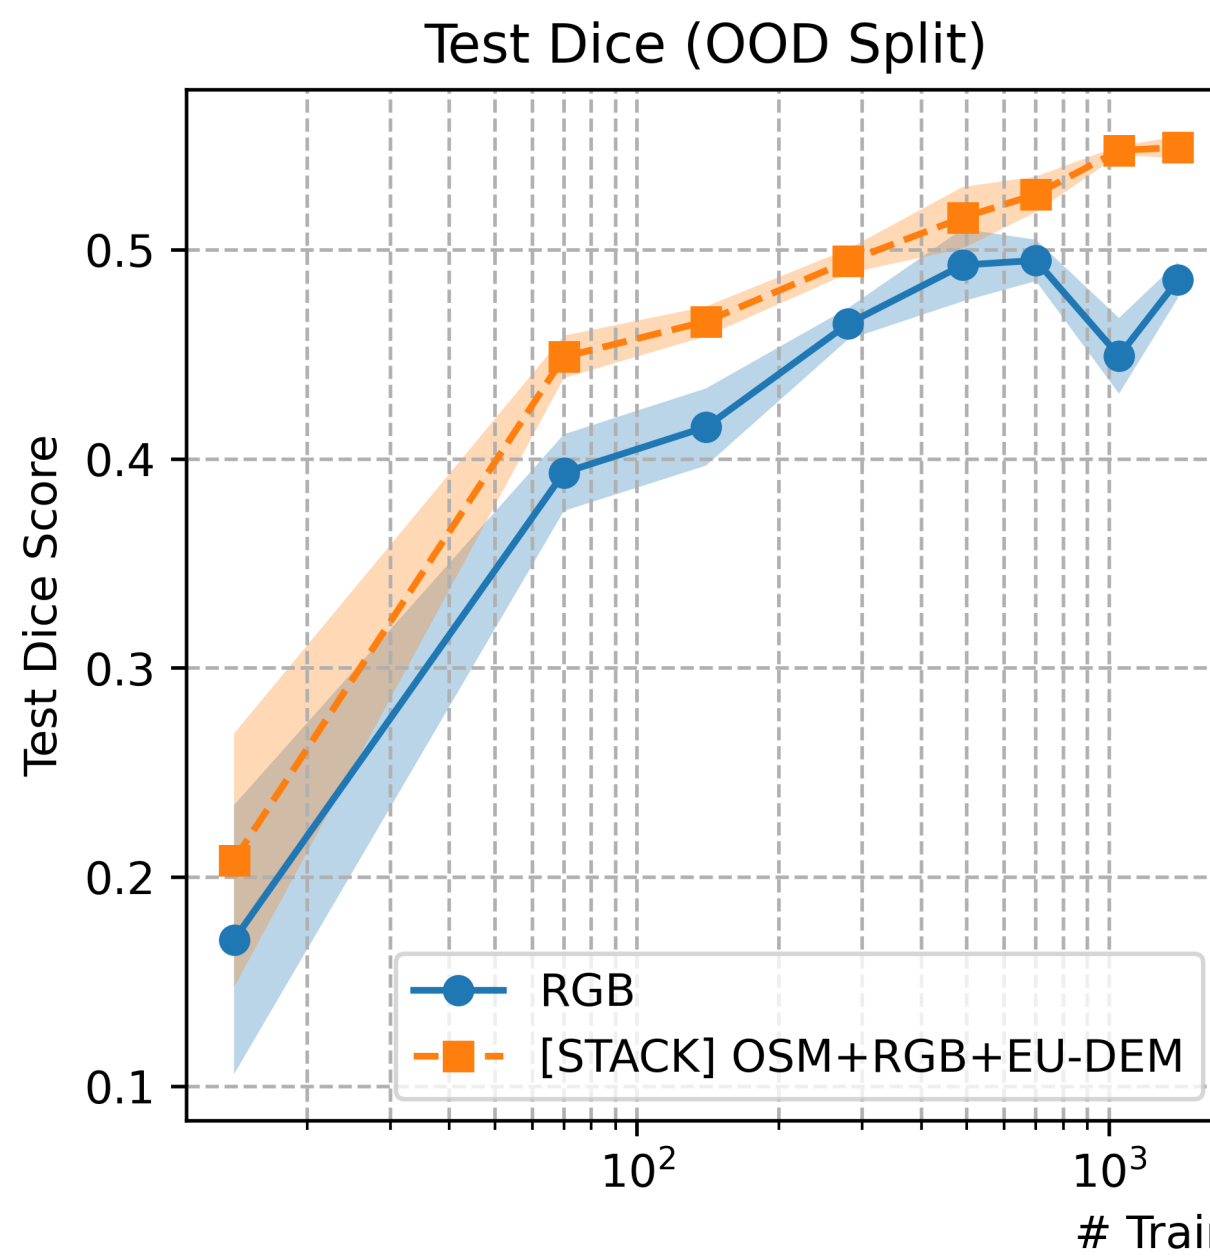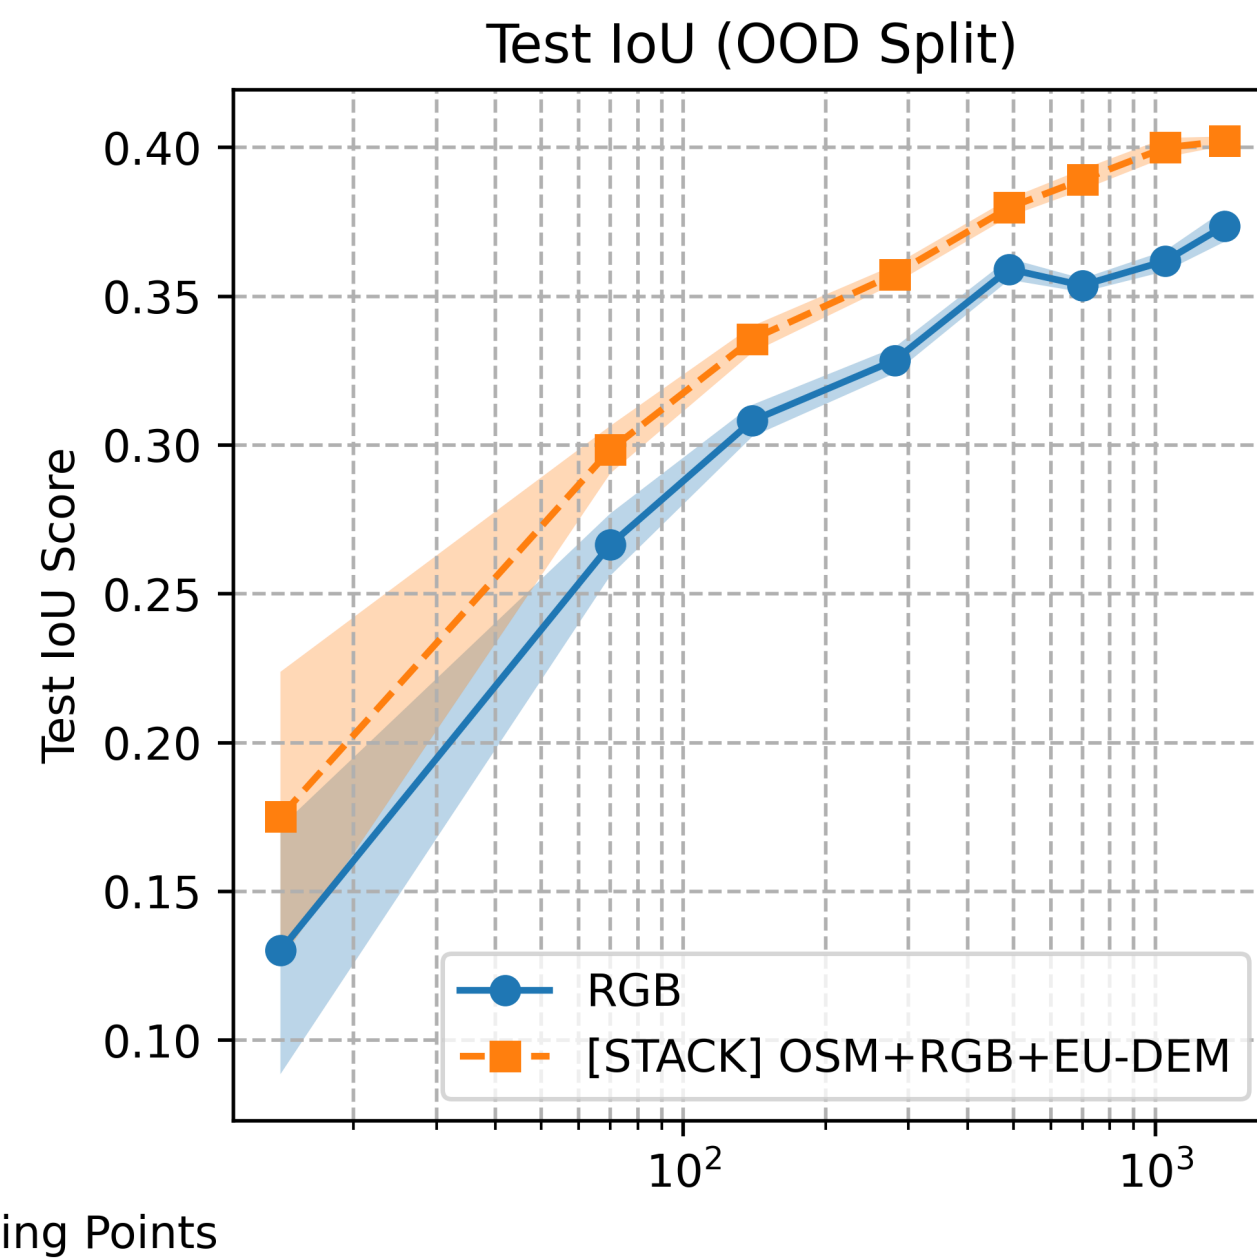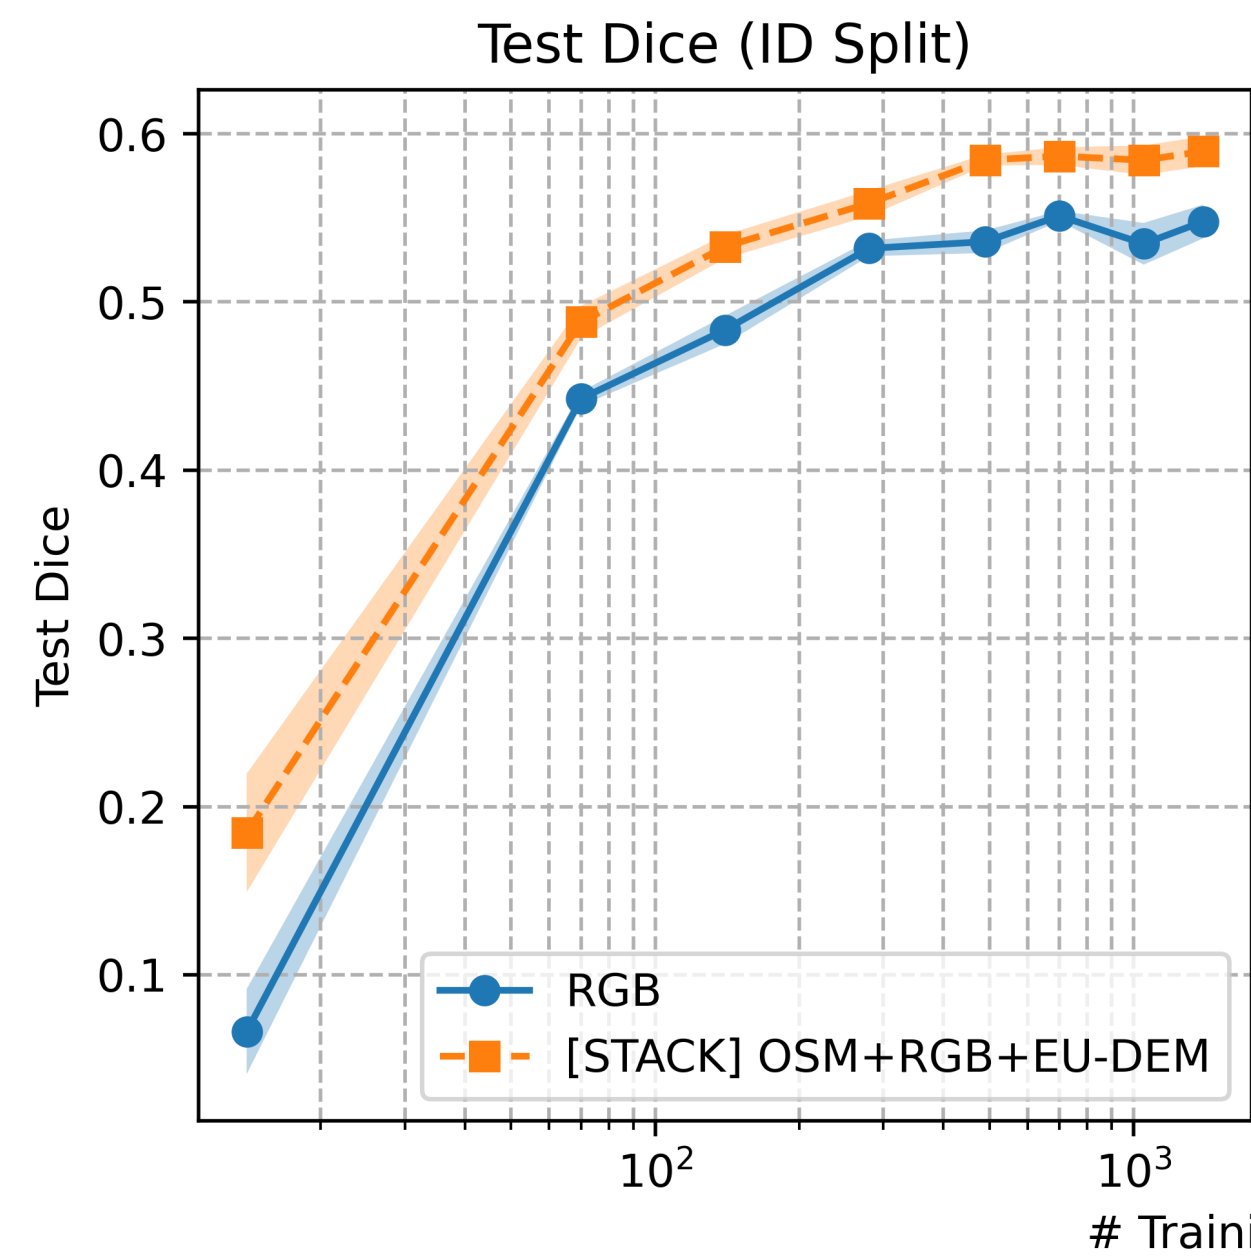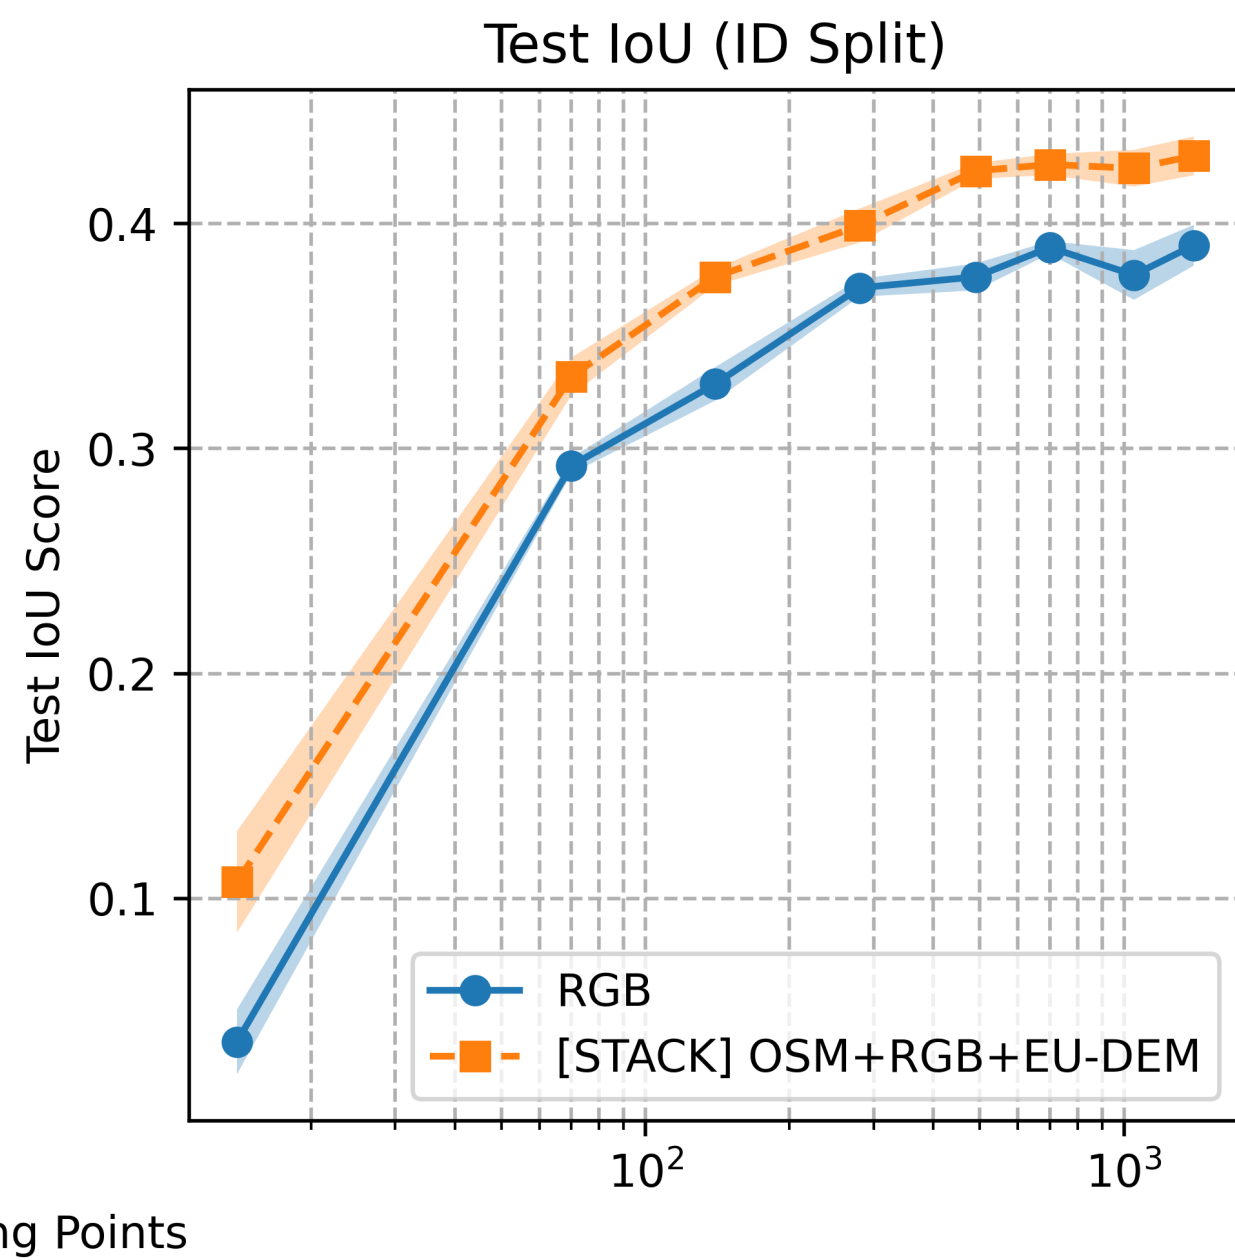

Supplement: supplementary_material [file attachment]

# STACK

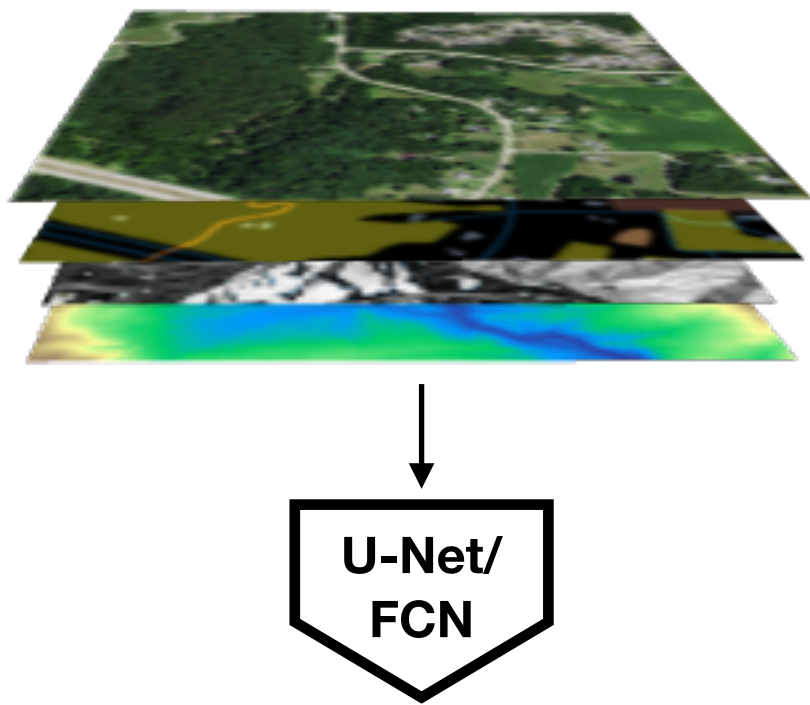

# PROC-STACK

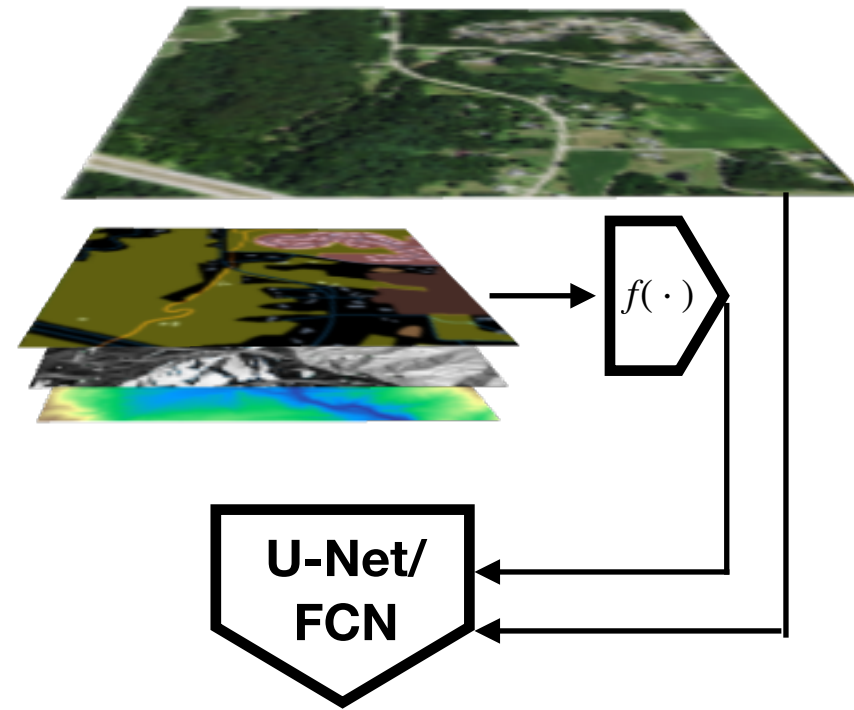

# TOKEN-FUSE

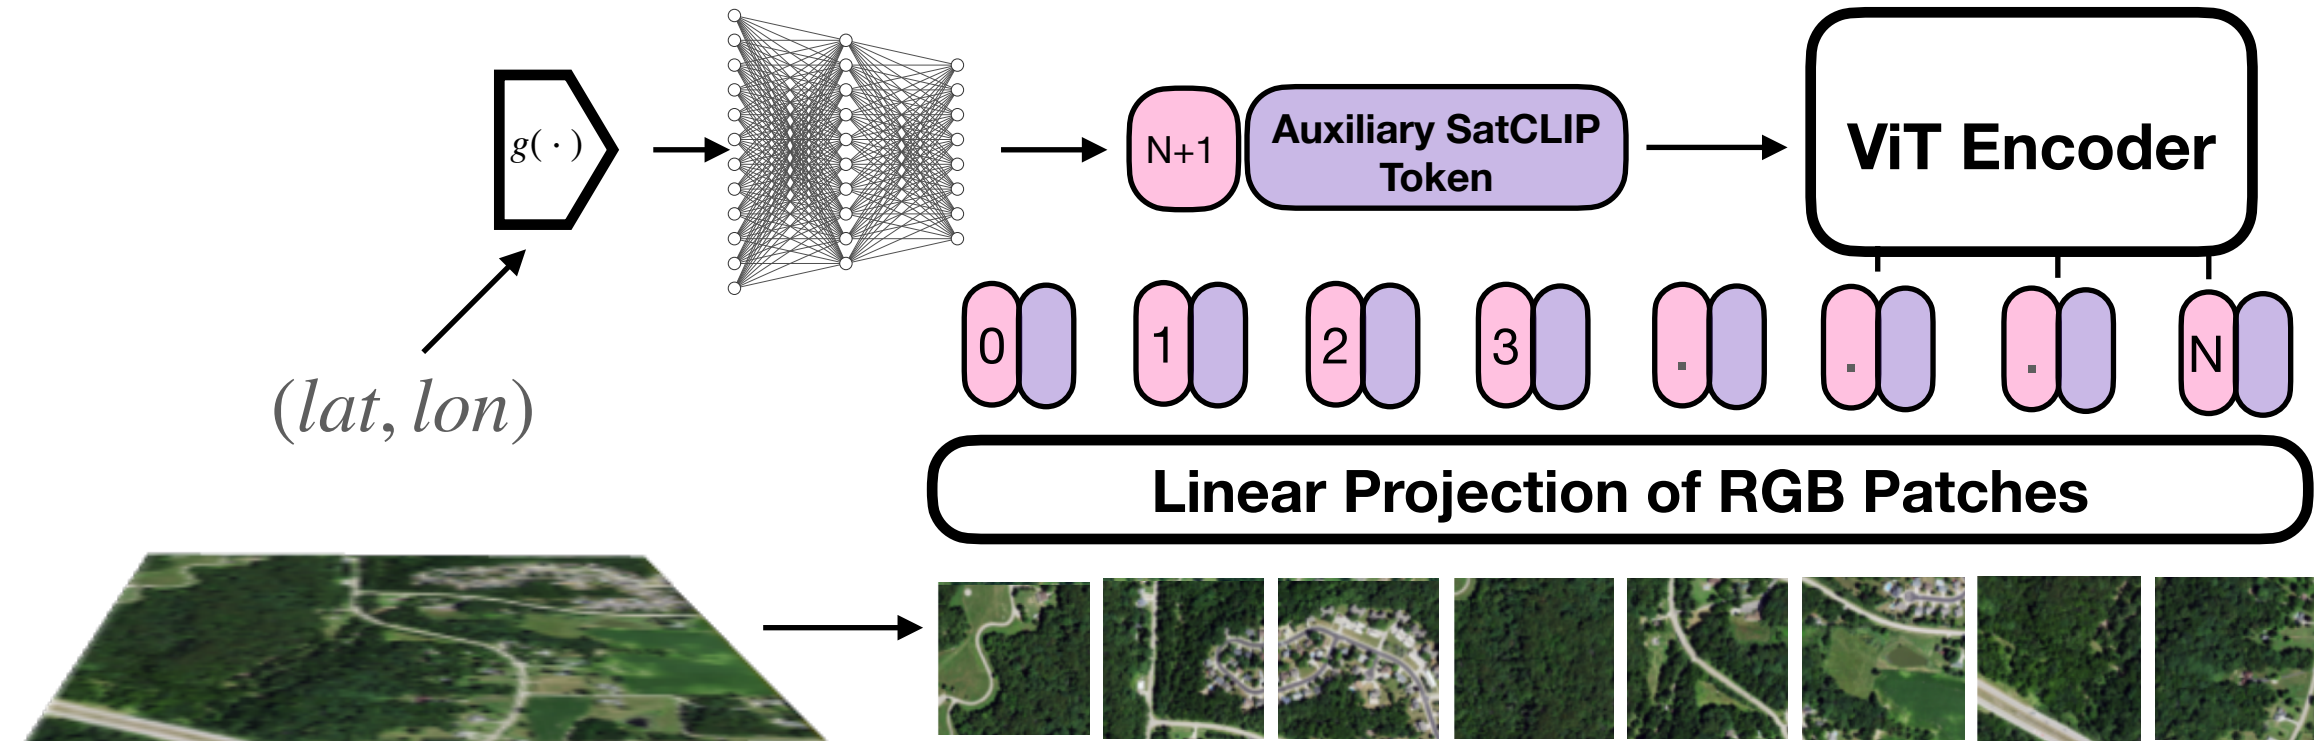

Supplement: supplementary_material [file attachment]

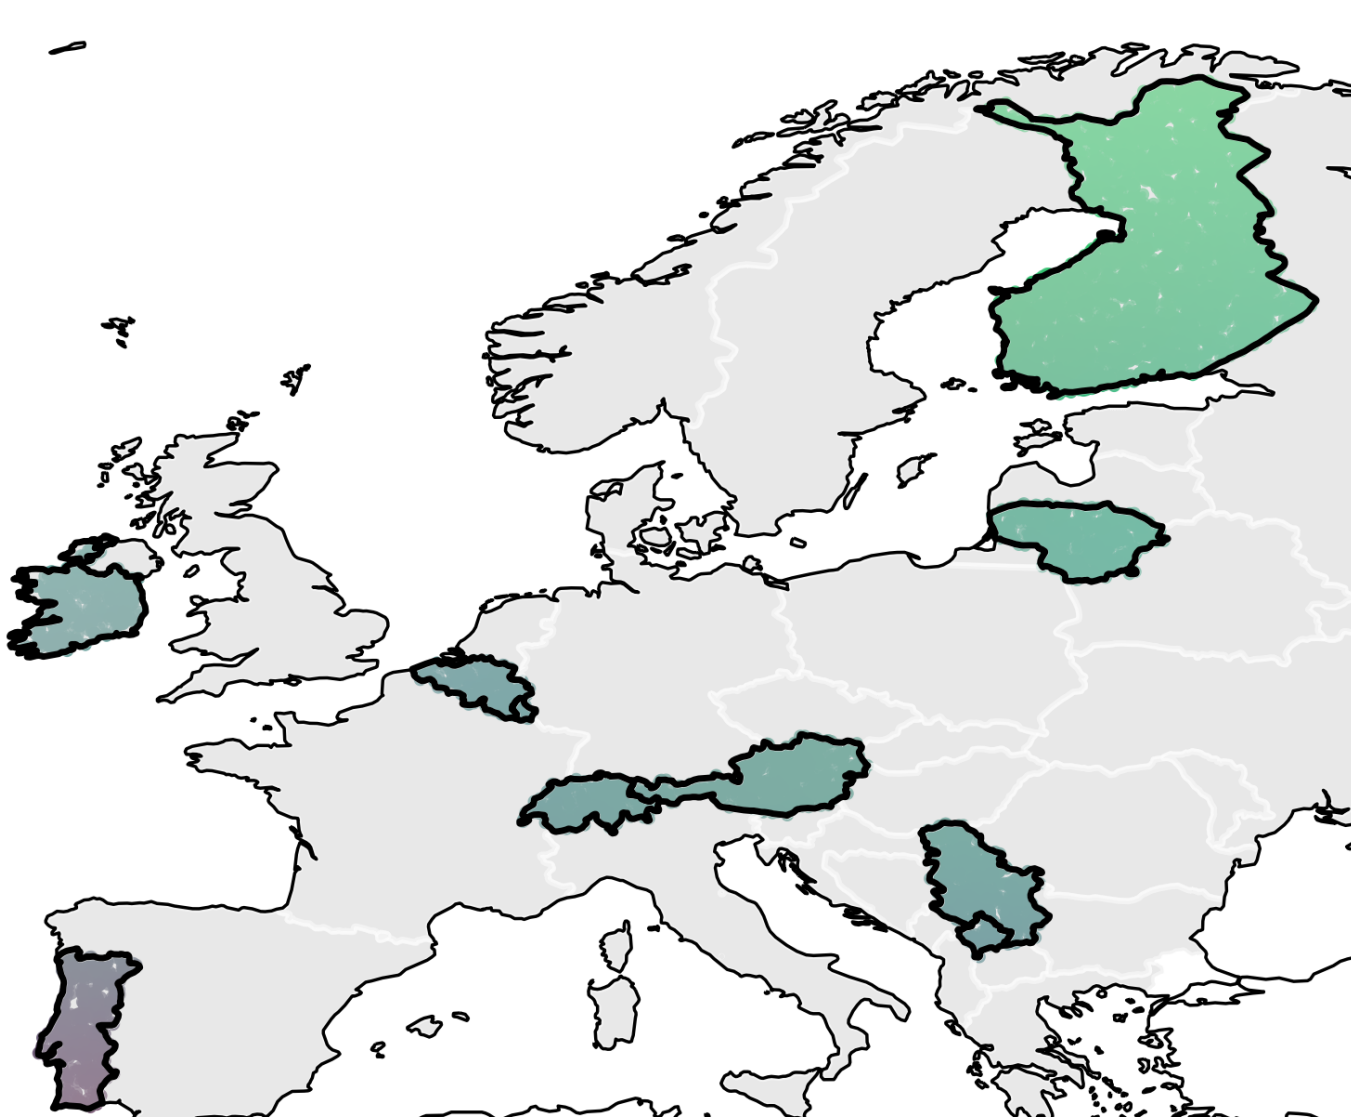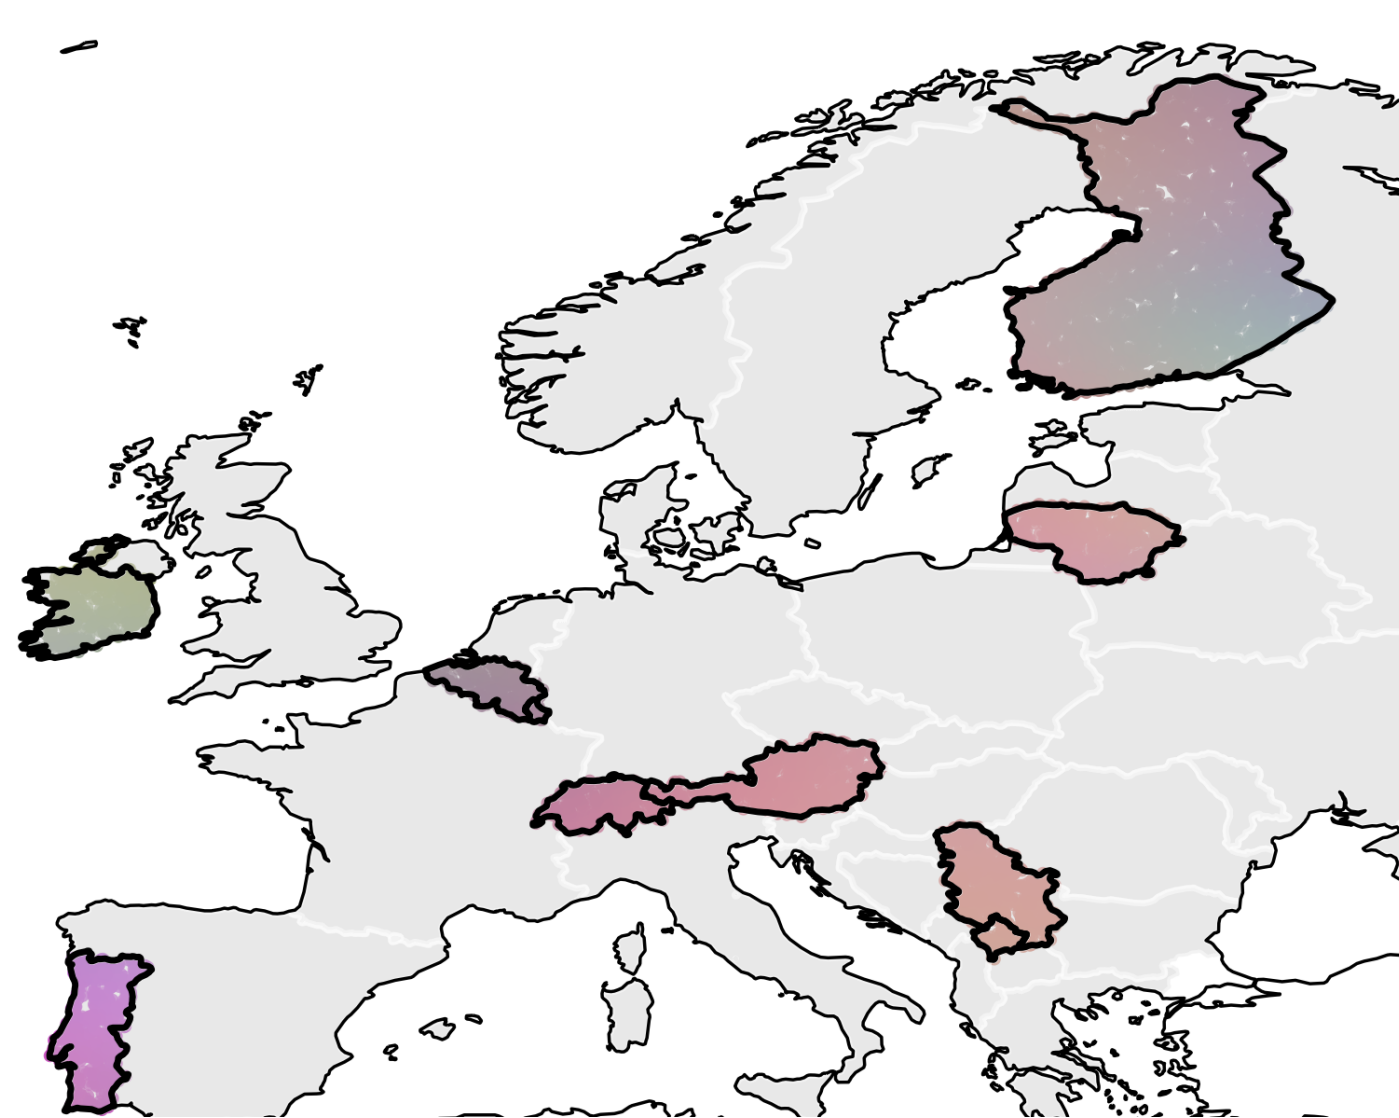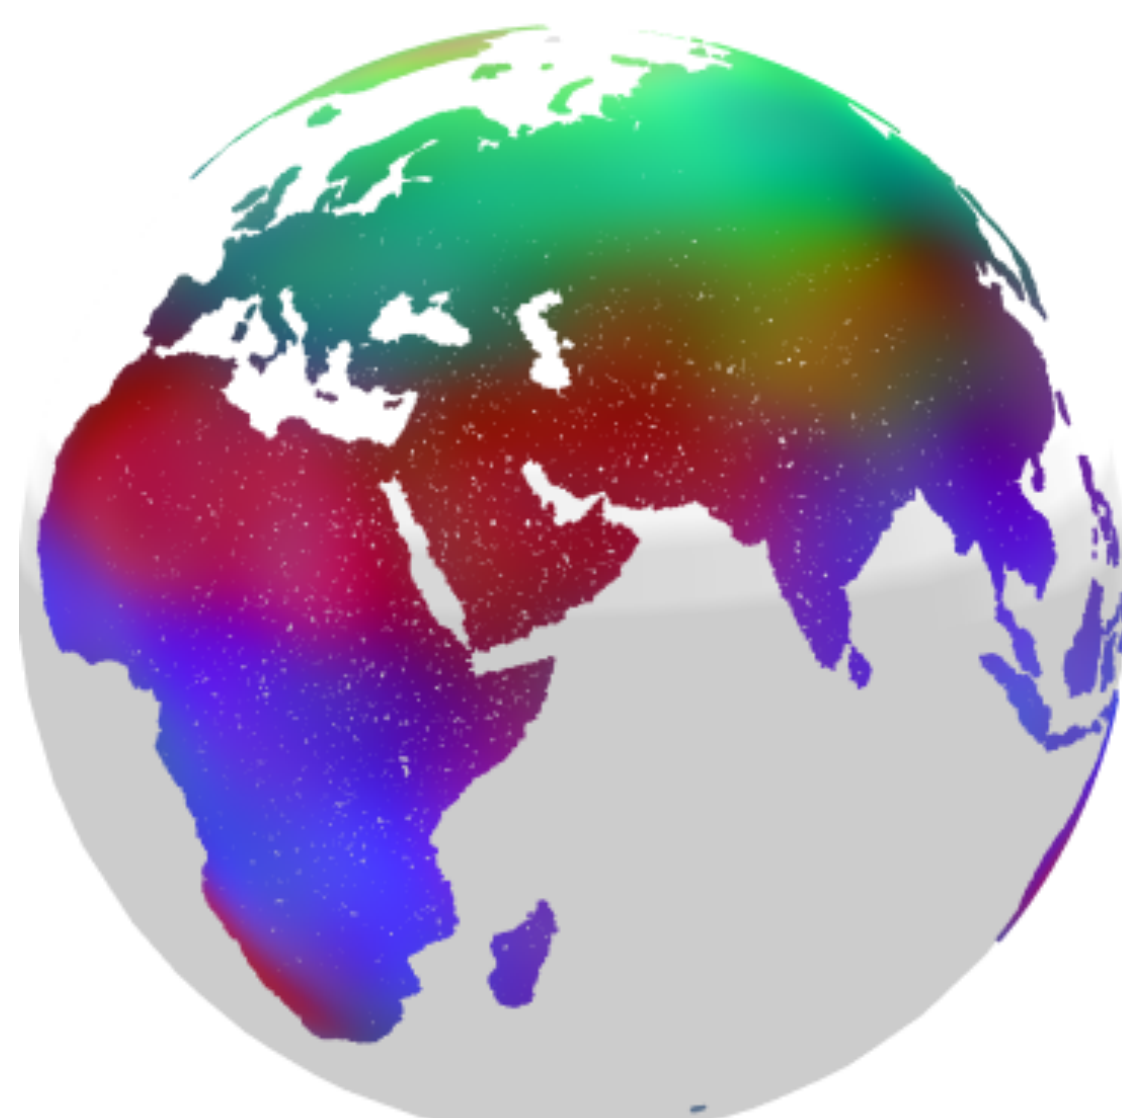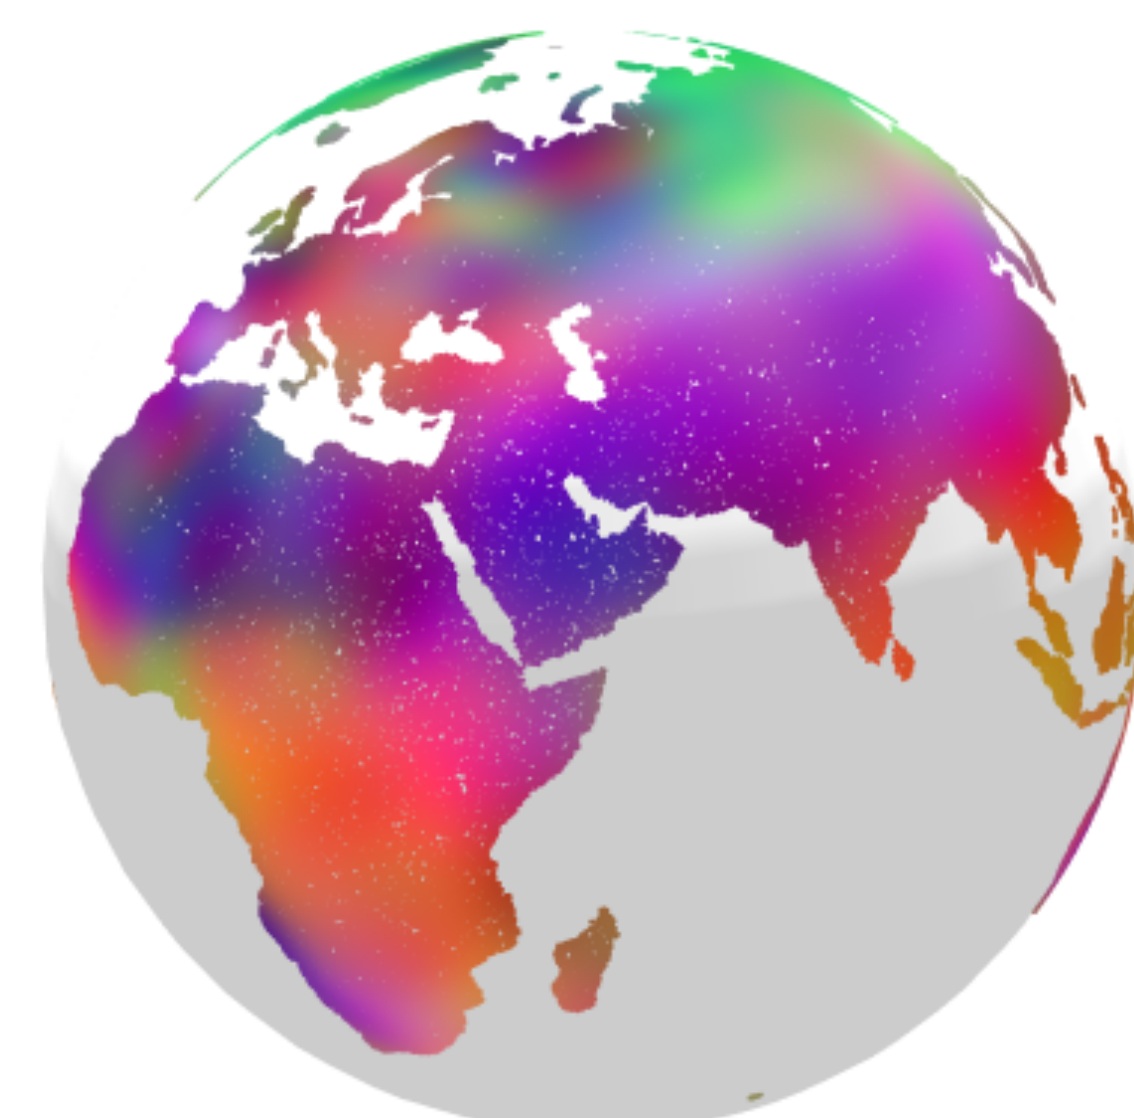

Supplement: supplementary_material [file attachment]
